1 **Complex evolutionary history of translation Elongation Factor 2 and diphthamide**  
2 **biosynthesis in Archaea and parabasalids**

3

4 Adrienne B. Narrowe<sup>1,†</sup>, Anja Spang<sup>2,3,†</sup>, Courtney W. Stairs<sup>2</sup>, Eva F. Caceres<sup>2</sup>, Brett J. Baker<sup>4</sup>,  
5 Christopher S. Miller<sup>1,‡,\*</sup> and Thijs J. G. Ettema<sup>2,‡</sup>

6

7 † These authors contributed equally to this work.

8 ‡ These authors contributed equally to this work.

9 \*Author for correspondence: Christopher S. Miller, Department of Integrative Biology,

10 University of Colorado Denver, Denver, CO, USA, 303-315-7665, [chris.miller@ucdenver.edu](mailto:chris.miller@ucdenver.edu)

11

12 <sup>1</sup> Department of Integrative Biology, University of Colorado Denver, Denver, Colorado, USA

13 <sup>2</sup> Department of Cell and Molecular Biology, Science for Life Laboratory, Uppsala University,  
14 Uppsala, Sweden

15 <sup>3</sup> NIOZ, Royal Netherlands Institute for Sea Research, Department of Marine Microbiology and  
16 Biogeochemistry, and Utrecht University, AB Den Burg, The Netherlands

17 <sup>4</sup> Department of Marine Science, Marine Science Institute, University of Texas Austin, Port  
18 Aransas, TX, USA

19

20

21 Running title: EF-2 and diphthamide in archaea and eukaryotes

22

23 **ABSTRACT**

24 Diphthamide is a modified histidine residue which is uniquely present in archaeal and eukaryotic  
25 elongation factor 2 (EF-2), an essential GTPase responsible for catalyzing the coordinated  
26 translocation of tRNA and mRNA through the ribosome. In part due to the role of diphthamide  
27 in maintaining translational fidelity, it was previously assumed that diphthamide biosynthesis  
28 genes (*dph*) are conserved across all eukaryotes and archaea. Here, comparative analysis of new  
29 and existing genomes reveals that some archaea (i.e., members of the Asgard superphylum,  
30 *Geoarchaea*, and *Korarchaeota*) and eukaryotes (i.e., parabasalids) lack *dph*. In addition, while  
31 EF-2 was thought to exist as a single copy in archaea, many of these *dph*-lacking archaeal  
32 genomes encode a second EF-2 paralog missing key-residues required for diphthamide  
33 modification and for normal translocase function, perhaps suggesting functional divergence  
34 linked to loss of diphthamide biosynthesis. Interestingly, some Heimdallarchaeota previously  
35 suggested to be most closely related to the eukaryotic ancestor maintain *dph* genes and a single  
36 gene encoding canonical EF-2. Our findings reveal that the ability to produce diphthamide, once  
37 thought to be a universal feature in archaea and eukaryotes, has been lost multiple times during  
38 evolution, and suggest that anticipated compensatory mechanisms evolved independently.

39

40 Key words: Asgard, Korarchaeota, Trichomonas, metagenomics, EF-2

## 41 INTRODUCTION

42 Elongation factor 2 (EF-2) is a critical component of the translational machinery that  
43 interacts with both the small and large ribosomal subunits. EF-2 functions at the decoding center  
44 of the ribosome, where it is necessary for the translocation of messenger RNA and associated  
45 tRNAs (Spahn, et al. 2004). Archaeal and eukaryotic EF-2, as well as the homologous bacterial  
46 EF-G, are members of the highly conserved translational GTPase protein superfamily (Atkinson  
47 2015). Gene duplications and subsequent neo-functionalizations have been inferred for  
48 eukaryotic EF-2 (eEF-2), with the identification of the spliceosome component Snu114  
49 (Fabrizio, et al. 1997), and Ria1, a 60S ribosomal subunit biogenesis factor (Becam, et al. 2001).  
50 Bacterial EF-G is involved in both translocation and ribosome recycling and has undergone  
51 multiple duplications, including sub-functionalizations separating the translocation and ribosome  
52 recycling functions (Suematsu, et al. 2010; Tsuboi, et al. 2009) as well as neo-functionalizations  
53 including roles in back-translocation(Qin, et al. 2006), translation termination (Freistroffer, et al.  
54 1997), regulation(Li, et al. 2014) and tetracycline resistance (Donhofer, et al. 2012). However, to  
55 date, archaea were thought to encode only a single essential protein within this superfamily, i.e.  
56 archaeal EF-2 (aEF-2) (Atkinson 2015).

57 Unlike bacterial EF-Gs, archaeal and eukaryotic EF-2s contain a post-translationally  
58 modified amino acid which is synthesized upon the addition of a 3-amino-3-carboxypropyl  
59 (ACP) group to a conserved histidine residue and its subsequent modification to diphthamide by  
60 the concerted action of 3 (in archaea) to 7 enzymes (in eukaryotes)(de Crécy-Lagard, et al. 2012;  
61 Schaffrath, et al. 2014). While diphthamide is perhaps best known as the target site of bacterial  
62 ADP-ribosylating toxins (Iglewski, et al. 1977; Jorgensen, et al. 2008) and as required for  
63 sensitivity to the antifungal sordarin (Botet, et al. 2008), its exact role remains a subject of

64 investigation. Yeast mutants incapable of synthesizing diphthamide have a higher rate of  
65 translational frame shifts, suggesting that this residue plays a critical role in reading frame  
66 fidelity during translation (Ortiz, et al. 2006). Furthermore, structural studies of eEF-2 using  
67 high-resolution Cryo-EM have indicated that diphthamide interacts directly with codon-  
68 anticodon bases in the translating ribosome, and facilitates translocation by displacing ribosomal  
69 decoding bases (Anger, et al. 2013; Murray, et al. 2016). In addition, diphthamide has been  
70 proposed to play a role in the regulation of translation, as it represents a site for reversible  
71 endogenous ADP-ribosylation (Schaffrath, et al. 2014), and in the selective translation of certain  
72 genes in response to cellular stress (Argüelles, et al. 2014). Given its anticipated role at the core  
73 of the translational machinery, it is not surprising that, with the sole exception of *Korarchaeum*  
74 *cryptofilum* (de Crécy-Lagard, et al. 2012; Elkins, et al. 2008), the diphthamide biosynthetic  
75 pathway is universally conserved in all archaea and eukaryotes. Indeed, while not strictly  
76 essential, loss of diphthamide biosynthesis has been shown to result in growth defects in yeast  
77 (Kimata and Kohno 1994; Ortiz, et al. 2006) and some archaea (Blaby, et al. 2010), and is either  
78 lethal or causes severe developmental abnormalities in mammals (Liu, et al. 2006; Webb, et al.  
79 2008; Yu, et al. 2014).

80 In the current study, we explore the evolution and function of EF-2 and of diphthamide  
81 biosynthesis genes using genomic data from novel major archaeal lineages that were recently  
82 discovered using metagenomics and single-cell genomics approaches (Adam, et al. 2017; Hug, et  
83 al. 2016; Spang, et al. 2017). In particular, we report the presence of EF-2 paralogs in many  
84 archaeal genomes belonging to the Asgard archaea, *Korarchaeota* and Bathyarchaeota (Evans, et  
85 al. 2015; He, et al. 2016; Lazar, et al. 2016; Meng, et al. 2014; Spang, et al. 2015; Zaremba-  
86 Niedzwiedzka, et al. 2017) and the unexpected absence of diphthamide biosynthesis genes in

87 several archaea and in parabasalid eukaryotes. Our findings reveal a complex evolutionary history  
88 of EF-2 and diphthamide biosynthesis genes, and point to novel mechanisms of translational  
89 regulation in several archaeal lineages. Finally, our results are compatible with scenarios in  
90 which eukaryotes evolved from an Asgard-related ancestor (Spang, et al. 2015; Zaremba-  
91 Niedzwiedzka, et al. 2017) and suggest the presence of a diphthamidated EF-2 in this lineage.

92

### 93 **MATERIALS AND METHODS**

#### 94 *Sampling and sequencing of ABR Loki- and Thorarchaeota.*

95 Sampling, DNA extraction, library preparation and sequencing was produced as described in  
96 (Zaremba-Niedzwiedzka, et al. 2017). We chose the four deepest samples, at 125 and 175 cm  
97 below sea-floor (MM3/PM3 and MM4/PM4 respectively), as they showed highest lokiarchaeal  
98 diversity in a maximum likelihood phylogeny of 5 to 15 ribosomal proteins (RP15) encoded on  
99 the same contig (Zaremba-Niedzwiedzka, et al. 2017). Adapters and low quality bases were  
100 trimmed using Trimmomatic version 0.32 with the following parameters: PE -phred33  
101 ILLUMINACLIP:NexteraPE-PE.fa:2:30:10:1:true LEADING:3 TRAILING:6  
102 SLIDINGWINDOW:4:15 MINLEN:36 (Bolger, et al. 2014).

103

#### 104 *Assembly of ABR Loki- and Thorarchaeota.*

105 Samples from the same depth were assembled together using IDBA-UD (Peng, et al. 2012)  
106 (version 1.1.1-384, --maxk 124 -r <MERGED\_READS>) producing four different assemblies  
107 (S1:MM1/PM1, S2:MM2/PM2, S3:MM3/PM3, S4:MM4/PM4). Assemblies S3 and S4 were  
108 particularly interesting as they showed the highest lokiarchaeal diversity. However, some  
109 lokiarchaeal members showed highly fragmented contigs, probably due to the low abundances of

110 these organisms. In an attempt to produce longer contigs we co-assembled those reads coming  
111 from Asgard archaea members in the samples MM3, PM3, MM4 and PM4. Asgard archaea reads  
112 were identified using Clark (version 1.2.3, -m 0) (Ounit, et al. 2015) and Bowtie2 (version 2.2.4,  
113 default parameters) (Langmead and Salzberg 2012) against a customized Asgard archaea  
114 database. Classified reads were extracted and co-assembled using SPAdes (version v.3.9.0, --  
115 careful) (Bankevich, et al. 2012).

116 In brief, the Asgard database was composed of Asgard genomes publicly available on February  
117 2017. Clark does not perform well when organisms present in the samples of interest are not  
118 highly similar to the ones present in the provided database. To increase the classification  
119 sensitivity, we included in our database low-quality Asgard MAGs (with highly fragmented  
120 contigs) generated from assemblies S3 and S4, using CONCOCT (Alneberg, et al. 2014).

121 Coverage profiles required by CONCOCT were estimated using kallisto (version 0.43.0, quant --  
122 plaintext) (Bray, et al. 2016). All available samples from the same location (MM1, PM1, MM2,  
123 PM2, MM3, PM3, MM4, PM4) were used and mapped independently against the assemblies S3  
124 and S4. For each assembly, MAGs were reconstructed using two different minimum contig  
125 length thresholds (2000 and 3000 bp). We used the number of containing clusters of ribosomal  
126 proteins (ribocontigs) as a proxy to estimate the microbial diversity present in the community.

127 The maximum number of clusters (-c option in CONCOCT) was estimated by calculating  
128 approximately 2.5 times the estimated number of species in the sample (Johannes Alneberg,  
129 personal communication), resulting into 900 and 600 for S3 and S4, respectively. Potential  
130 Asgard archaea bins were identified based on the presence of ribocontigs classified as Asgard  
131 archaea and were included in the database.

132

133 ***Binning of ABR Loki- and Thorarchaeota.***

134 Several binning tools with different settings were run independently: CONCOCT\_2000: version  
135 0.4.0, --read\_length 200 and minimum contig length of 2000. CONCOCT\_3000: version 0.4.0, --  
136 read\_length 200 and minimum contig length of 3000. In both cases, coverage files were created  
137 mapping all 8 samples against the co-assembly using kallisto. MaxBin2: version 2.2.1, -  
138 min\_contig\_length 2000 -markerset 40 -plotmarker (Wu, et al. 2016). The 8 samples were  
139 mapped against the co-assembly using Bowtie2. Coverage was estimated using the getabund.pl  
140 script provided. MyCC\_4mer: 4mer -t 2000 (Lin and Liao 2016). MyCC\_56mer: 56mer -t 2000.  
141 Both coverage profiles were obtained as the authors described in their manual.  
142 The results of those 5 binning methods were combined into a consensus: contigs were assigned  
143 to bins if they had been classified as the same organism by at least 3 out of 5 methods. The  
144 resulting bins were manually inspected and cleaned further using mmgenome (Albertsen, et al.  
145 2013). Completeness and redundancy was computed using CheckM (Parks, et al. 2015).

146

147 ***Sampling and sequencing of OWC Thorarchaeota.***

148 Eight soil samples were collected from the Old Woman Creek (OWC) National Estuarine  
149 Research Reserve and DNA was extracted as described previously (Narrowe, et al. 2017).  
150 Library preparation and five lanes of Illumina HiSeq 2x125 bp sequencing followed standard  
151 operating procedures at the US DOE Joint Genome Institute (GOLD study ID Gs0114821).  
152 Sample M3-C4-D3 had replicate extraction, library preparation, and two lanes of sequencing  
153 performed, and reads were combined before downstream analysis. For 3 additional samples (M3-  
154 C4-D4, O3-C3-D3, O3-C3-D4) one lane of sequencing was performed. For the other 4 samples  
155 (M3-C5-D1, M3-C5-D2, M3-C5-D3, M3-C5-D4) DNA was sheared to 300bp with a Covaris

156 S220, metagenomic sequencing libraries were prepared using the Nugen Ovation Ultralow Prep  
157 kit, and all four samples were multiplexed on one lane of Illumina HiSeq 2x125 sequencing at  
158 the University of Colorado Denver Anschutz Medical Campus Genomics and Microarray Core.

159

### 160 *Assembly and binning of OWC Thorarchaeota.*

161 For initial assembly of the 5 full-lane sequencing runs, adapter removal, read filtering and  
162 trimming were completed using BBDuk ([sourceforge.net/projects/bbmap](http://sourceforge.net/projects/bbmap)) ktrim=r, minlen=40,  
163 minlenfraction=0.6,

164 mink=11 tbo, tpe k=23, hdist=1 hdist2=1 ftm=5 , maq=8, maxns=1, minlen=40,

165 minlenfraction=0.6, k=27, hdist=1, trimq=12, qtrim=rl. Filtered reads were assembled using

166 megahit (Li, et al. 2015) version 1.0.6 with --k-list 23,43,63,83,103,123.

167 The individual metagenome from the O3-C4-D3 sample was binned using Emergent Self-

168 Organizing Maps (ESOM)(Dick, et al. 2009) of tetranucleotide frequency (5kb contigs, 3kb

169 windows). BLAST hits of predicted proteins identified a Thorarchaeota population bin. All

170 scaffolds containing a window in this bin were used as a mapping reference and reads from the 9

171 OWC libraries were mapped to this bin using bbsplit with default parameters

172 ([sourceforge.net/projects/bbmap](http://sourceforge.net/projects/bbmap)). The mapped reads were reassembled using SPAdes version

173 3.9.0 with --careful -k 21,33,55,77,95,105,115,125 (Bankevich, et al. 2012). Finally, the reads

174 which were input to the reassembly were mapped to the assembled scaffolds using Bowtie 2

175 (Langmead and Salzberg 2012) to generate a coverage profile which was used to manual identify

176 bins using Anvi'o (Eren, et al. 2015). Proteins were predicted using prodigal (Hyatt, et al. 2010)

177 and searched against UniRef90 release 11-2016 (Suzek, et al. 2015), with the taxonomy of best

178 blast hits used to validate contigs as probable Thorarchaeota. Contigs having no top hit to the



179 publicly available Thorarchaeota genomes were manually examined and removed if they could  
180 be assigned to another genome bin in the larger metagenomic assembly. Genome completeness  
181 and contamination was estimated using CheckM (Parks, et al. 2015).

182

183 ***Identification of diphthamide biosynthesis genes and EF-2 homologs in eukaryotes and***  
184 ***archaea.***

185 The EGGNOG members dataset (available at <http://eggnogdb.embl.de/#/app/downloads>) was  
186 surveyed for sequences corresponding to the following clusters of orthologous groups (COG):  
187 EF-2, COG0480; DPH1/DPH2, COG1736; DPH3, COG5216; DPH4, COG0484; DPH5,  
188 COG1798; DPH6, COG2102; and DPH7, ENOG4111MMJ. For genomes not represented in  
189 EGGNOG, we manually inspected publicly available genomes as indicated by ‘orthology  
190 assignment source’ (Supplementary File S1). Similarly, an in-house arCOG dataset, modeled  
191 after the publicly available arCOGs from Makarova et al. (Makarova, et al. 2015), was queried  
192 for the corresponding COG distribution in relevant archaeal genomes. Finally, aEF-2 and aEF-2p  
193 genes in Thorarchaeota OWC Bin 2,3 and 5 were identified using HMMER: version 3.1b2,  
194 `hmmsearch --cut-tc` (Eddy 2011) against PFAM models PF00679 (EF-G\_C) and PF03764  
195 (EFG\_IV). Conserved synteny surrounding the Thorarchaeota aEF-2p gene was used to further  
196 search for partial aEF-2p genes. In addition, all contigs with matching HMM hits to *dph2* and  
197 *dph5* in the full OWC assembly were manually examined for potential Thorarchaeal *dph* genes;  
198 none were identified.

199

200 ***Phylogenetic analyses***

201 Elongation factor 2: EF-2 and EF-2 paralogs of Asgard archaea, Koarchaeota and  
202 Bathyarchaeota were aligned with a representative set of archaeal, bacterial EF-2 and eukaryotic  
203 EF-2, EFL1 and snRNP homologs using mafft-linsi (Kato and Standley 2013). Subsequently,  
204 poorly aligned ends were removed manually before the alignments were trimmed with trimAl  
205 5% (Capella-Gutierrez, et al. 2009), yielding 871 aligned amino acid positions. Maximum  
206 likelihood analyses were performed using IQ-tree using the mixture model LG+C60+R4+F,  
207 which was selected among the C-series models based on its Bayesian information criterion score  
208 by the built-in model test implemented in IQ-tree. Branch supports were assessed using ultrafast  
209 bootstrap approximation as well as with single branch test (-alrt option).

210 Diphthamide biosynthesis proteins Dph1/Dph2 (IPR016435; arCOG04112) and Dph5  
211 (IPR004551; arCOG04161): Both Dph1 and Dph2 as well as Dph5 homologs of a representative  
212 set of eukaryotes were aligned with archaeal Dph1/2 and Dph5 homologs, respectively. Several  
213 DPANN genomes contain two genes encoding the CTD and NTD of Dph1/2 (Fig. 1,  
214 Supplementary File S1) such that Dph1/2 homologs of these organisms had to be concatenated  
215 prior to aligning Dph1/2 sequences. Alignments were performed using mafft-linsi and trimmed  
216 with BMGE (Criscuolo and Gribaldo 2010) using the blossom 30 matrix and setting the entropy  
217 to 0.55. This resulted in final alignments of 170 (Dph1/2) and 221 (Dph5). Maximum likelihood  
218 analyses were performed using IQ-tree (Nguyen, et al. 2015) with the mixture models resulting  
219 in the lowest BIC: LG+C50+R+F (Dph1/2) and LG+C60+R+F (Dph5), respectively. Branch  
220 supports were assessed using ultrafast bootstrap approximation (Hoang, et al. 2018) as well as  
221 with the single branch test (-alrt flag).

222 Concatenated ribosomal proteins: A phylogenetic tree of co-localized ribosomal proteins was  
223 performed using the rp15 pipeline as described previously (Zaremba-Niedzwiedzka, et al. 2017).

224 In brief, archaeal ribosomal proteins encoded in the r-protein gene cluster (requiring a minimum  
225 of 11 ribosomal proteins) were aligned with mafft-linsi, trimmed with trimAl using the -  
226 gappyout option, concatenated and subjected to maximum likelihood analyses using IQ-tree with  
227 the LG+C60+R4+F model chosen based on best BIC score as described above. Branch supports  
228 were assessed using ultrafast bootstrap approximation as well as with the single branch test (-alrt  
229 option) in IQTREE.

230

### 231 ***Structural modeling of EF-2 homologs.***

232 Structural models of a/eEF-2 genes and paralogs were generated using the i-Tasser standalone  
233 package version 5.1 (Yang, et al. 2015), and visualized and analyzed using UCSF Chimera  
234 version 1.11.12 (Pettersen, et al. 2004). The best structural hits to the PDB for each sequence's  
235 top-scoring model were identified using COFACTOR (Roy, et al. 2012). The *Drosophila*  
236 *melanogaster* eEF-2 structure in complex with the ribosome (PDB:4V6W) was used as a  
237 structural reference to which all models were superimposed (aligned) using Chimera's  
238 MatchMaker.

239

### 240 ***Loop motif logos of EF-2 homologs***

241 e/aEF-2 and paralog sequences which were used to generate the EF-2 tree were clustered at 90%  
242 amino acid identity using CD-HIT: version 4.6, -c 0.9 -n 5 (Fu, et al. 2012) and the sequence  
243 alignment was filtered to retain only cluster centroids. The conserved loop sequences were  
244 extracted from the filtered EF-2 alignment using Jalview version 2.10.1 (Waterhouse, et al.  
245 2009), verified by cross-referencing to the structural models, and sequence logos generated on

246 cluster centroids only using WebLogo: version 2.8.2 (weblogo.berkeley.edu) (Crooks, et al.  
247 2004).

248

### 249 *Accession Numbers*

250 Taxonomy and accession numbers for all genes analyzed in this study are listed in  
251 Supplementary File S1.

252

## 253 **RESULTS**

### 254 **Most Asgard archaea, *Korarchaeota* and *Geoarchaea* as well as parabasalids lack** 255 **diphthamide synthesis genes**

256 It was previously assumed that EF-2 of all eukaryotes and Archaea was uniquely characterized  
257 by the presence of diphthamide. To examine if this assumption is still valid when taking into  
258 account recently sequenced genomes, we surveyed 337 archaeal and 168 eukaryotic genomes  
259 (File S1) for each of the three known archaeal (de Crécy-Lagard, et al. 2012) and seven  
260 eukaryotic (Su, et al. 2012a; Su, et al. 2012b; Uthman, et al. 2013) *dph* genes. While most  
261 archaeal genomes encode clear *dph* homologues, we failed to detect the diphthamide  
262 biosynthesis genes in a large diversity of metagenome-assembled genomes (MAGs) of  
263 uncultured archaea, including newly assembled MAGs analyzed for this study (Fig. 1,  
264 Supplementary Fig. S1, Supplementary File S1). In particular, our analyses showed that, as  
265 reported for *K. cryptophilum* (de Crécy-Lagard, et al. 2012; Elkins, et al. 2008), all *Korarchaeota*  
266 and *Geoarchaea* as well as nearly all members of the Asgard archaea lack the conserved archaeal  
267 diphthamide biosynthesis genes *dph1/2*, *dph5* and *dph6*. As an exception, Asgard archaea related  
268 to the Heimdallarchaeote LC3 clade were found to encode the complete archaeal diphthamide

269 biosynthetic pathway (Fig. 1). Genes coding for Dph5 and Dph6 could not be detected in two  
270 Bathyarchaeota draft genomes (RBG\_13\_46\_16b and SG8\_32\_3). However, it is unclear  
271 whether these two genomes are in the process of losing *dph* biosynthesis genes or whether the  
272 absence of *dph5* and *dph6* genes is due to the incompleteness of these draft genomes. We also  
273 surveyed 168 eukaryotic genomes and high-quality transcriptomes, including those lineages that  
274 have undergone drastic genome reduction, such as microsporidians (Corradi, et al. 2010),  
275 diplomonads (Morrison, et al. 2007), and degenerate nuclei (i.e., nucleomorphs) of secondary  
276 plastids in cryptophytes (Lane, et al. 2007) (Supplementary File S1) for *dph* gene homologs. We  
277 detected *dph* homologues in all eukaryotic genomes and transcriptomes except for parabasalid  
278 protists, including animal pathogens such as *Trichomonas vaginalis*, *Tritrichomonas foetus* and  
279 *Dientamoeba fragilis* (Supplementary File S1). Unless these archaea and parabasalids possess  
280 alternative, yet undiscovered diphthamide biosynthesis pathways, these findings suggest that  
281 their cognate EF-2 lacks the modified diphthamide residue. As a peculiarity, while the Dph1/2  
282 protein is encoded by a single fusion gene in seemingly all archaea, we found that in several  
283 members of the DPANN archaea (Castelle, et al. 2015; Rinke, et al. 2013) this protein is encoded  
284 by two genes that separately code for the N- and C-terminal domains. To our knowledge, this is  
285 the first systematic report of the widespread absence of diphthamide biosynthesis in diverse  
286 eukaryotes and archaea.

287

288 **Various archaeal genomes that lack diphthamide biosynthesis genes encode an EF-2**  
289 **paralog**

290 To shed light into the implications of the potential lack of diphthamide in members of the Asgard  
291 archaea and *Korarchaeota*, we performed detailed analyses of eukaryotic and archaeal EF-2

292 homologs (Fig. 1). First, we found that the draft genomes of most Asgard archaea, some  
293 *Korarchaeota* (Kor 1 and 3), and a few Bathyarchaeota encode two distantly related EF-2  
294 paralogs. In contrast, the genomes of *K. cryptophilum* and two novel marine *Korarchaeota* (Kor 2  
295 and 4) and Heimdallarchaeota LC2 and LC3 as well as *Geoarchaea* do not encode an EF-2  
296 paralog. Given that the Heimdallarchaeota LC2 genome was estimated to be only 70-79 %  
297 complete (Zaremba-Niedzwiedzka, et al. 2017), and based on phylogenetic analyses (see below),  
298 we consider it possible that this genome might encode an as-yet unassembled aEF-2 paralog. The  
299 presence of paralogous aEF-2 in most Asgard archaea and some *Korarchaeota* genomes  
300 corresponds with the absence of diphthamide synthesis genes (Fig. 1 and 2). Yet, even though  
301 the genomes of *K. cryptophilum*, Kor 2, Kor 4, and *Geoarchaea* as well as of Heimdallarchaeote  
302 LC2 lack *dph* genes, they do not encode an EF-2 paralog. In all other archaeal genomes,  
303 including that of Heimdallarchaeote LC3, the absence of an EF-2 paralog correlates with the  
304 presence of *dph* genes.

305

### 306 **Archaea with two EF-2 family proteins encode only one *bona fide* EF-2**

307 We next addressed whether residues and structural motifs shown to be necessary for canonical  
308 translocation were conserved in the various EF-2 and EF-2 paralogs. Domain IV of EF-2,  
309 representing the anticodon mimicry domain, is critical for facilitating concerted translocation of  
310 tRNA and mRNA (Ortiz, et al. 2006; Rodnina, et al. 1997). This domain includes three loops  
311 that extend out from the body of EF-2 and interact with the decoding center of the ribosome. The  
312 first of these three loops (HxDxxHRG) (canonical residue positions are numbered according to  
313 sequence associated with *D. melanogaster* structural model PDB 4V6W (Anger, et al. 2013))  
314 contains the site of the diphthamide modified histidine, H701, and is highly conserved across

315 archaea and eukaryotes (Ortiz, et al. 2006; Zhang, et al. 2008). High conservation is also seen in  
316 a second adjacent loop (SPHKHN) in the a/eEF-2 domain IV (S581-N586), which contains a  
317 lysine residue (K584) that interacts directly with the tRNA at the decoding center, and is itself  
318 positioned by a stacking interaction between P582 and H585 (Murray, et al. 2016). The third  
319 loop appears to stabilize the diphthamide loop, partially via a salt-bridge formed between a  
320 nearby glutamate residue (E660) and R702 in the diphthamide loop (Anger, et al. 2013). Both of  
321 these residues are highly conserved among archaea and eukaryotes.

322 Our analyses reveal that the sequence motifs in these loops are also strictly conserved  
323 among the EF-2 family proteins of the Heimdallarchaeote LC3 lineage, *Geoarchaea*, as well as  
324 in those *Korarchaeota* and Bathyarchaeota that lack an EF-2 paralog (Fig. 3, Supplementary Fig.  
325 S2a). Notably, this conservation is seen irrespective of the presence or absence of *dph* genes in  
326 those genomes. However, most *bona fide* EF-2 of parabasalids (which lack *dph* genes), possesses  
327 a glycine to asparagine mutation at residue 703 (Fig. 3, Supplementary Fig. S2b, Supplementary  
328 Fig. S3a), which may compensate for the lack of the diphthamide residue by contributing an  
329 amide group (Fig. 3, Supplementary Fig. S3b).

330 In contrast, in those Asgard archaea and *Korarchaeota* (Kor 1/3 clade) that encode two  
331 EF-2 family proteins, even within the *bona fide* EF-2 copy, these domain IV motifs show  
332 reduced conservation. In the diphthamide loop, R702 is universally replaced by a threonine  
333 residue. In 21 of 22 aEF-2 proteins, there is a correlated mutation of E660 to either arginine or  
334 lysine (Supplementary Fig. S4). Structural homology modeling suggested that these correlated  
335 mutations likely prevent unfavorable electrostatic interactions between domain IV loops, and  
336 maintain stabilization of the diphthamide loop (Supplementary Fig. S4). While G703 is  
337 conserved in most EF-2s of archaea, all Lokiarchaeota (except Lokiarchaeota CR\_4), encode

338 either a serine or a glutamine at this site (Fig. 3, Supplementary Fig. S2a). Furthermore, analysis  
339 of the second loop (S581-N586) revealed additional crucial mutations in the EF-2 of these  
340 archaea; notably, K584 is not conserved (Fig. 3, Supplementary Fig. S2a). Despite these  
341 modifications which correlate with the presence of an EF-2 paralog in these archaea, there is still  
342 evidence for strong selection pressure maintaining many of the key conserved residues in these  
343 domain IV motifs, including H701, the target site of diphthamide modification (Fig. 3,  
344 Supplementary Fig. S2a).

345 In contrast, our analyses of the multiple sequence alignment and structural models  
346 suggest that the paralogous EF-2 (aEF-2p) proteins encoded by these archaea lack conservation  
347 in the stabilizing second loop (SPHKHN) as well as the first diphthamide loop (HxDxxHRG),  
348 including H701 (Fig. 3). Based on predicted fold conservation in domains I and II, and the  
349 overall conservation of the five sequence motifs (G1-G5) characterizing GTPase superfamily  
350 proteins (Atkinson 2015), aEF-2p likely maintains GTPase activity (Supplementary Fig. S5).  
351 However, given the apparent lack of conservation in key domain IV loops, it is unlikely that  
352 aEF-2p proteins can serve as functional translocases in protein translation.

353

### 354 **EF-2 homologs of archaea experienced complex evolutionary history**

355 To resolve the evolutionary history of EF-2, we performed phylogenetic analyses of archaeal EF-  
356 2 (aEF-2) and aEF-2p, bacterial EF-G and eukaryotic EF-2 family proteins, i.e. EF-2, Ria1 (or  
357 Elongation factor like, EFL1) and Snu114 (or U5 small nuclear ribonucleoprotein, snRNP/ U5-  
358 116kD) (Fig. 2) (Atkinson 2015). First, our analyses revealed that sequences from all non-LC3  
359 Asgard archaea and the Kor-1 and -3 marine *Korarchaeota* formed two distinct clades, one of  
360 which contains canonical aEF-2 proteins (as defined by conservation of the domain IV loop



361 known to interact with the ribosomal decoding center during translocation) while the other  
362 cluster comprises aEF-2p (Fig. 2). However, the phylogenetic placement of these protein clades  
363 relative to each other and within the phylogenetic backbone is not fully resolved due to lack of  
364 statistical support. This might be caused by modified (accelerated) evolutionary rates that appear  
365 to characterize the evolution of aEF-2 and aEF-2p in lineages that encode a paralog, as indicated  
366 by increased relative branch lengths for both the aEF-2 and aEF-2p clades (Fig. 2,  
367 Supplementary Files S2 and S3).

368         Secondly, bathyarchaeal EF-2 homologs were also found to form two separate clades.  
369 One of these clades is placed within the TACK superphylum, and includes both canonical  
370 bathyarchaeal EF-2s as well as potential paralogs (i.e., RBG\_13\_46\_16b and SG8-32-3). In  
371 contrast, the second clade is only comprised of two sequences (i.e., RBG\_13\_46\_16b and AD8-  
372 1), and is placed as a sister group of all TACK, Asgard and eukaryotic EF-2 homologs (Fig. 2).  
373 In spite of this deep placement in the phylogenetic analyses, the second clade is comprised of the  
374 canonical EF-2 homologs of Bathyarchaeota genomes RBG\_13\_46\_16b and AD8-1, based on  
375 analysis of key domain IV residues. Currently, only the most complete of the latter two draft  
376 genomes, RBG\_13\_46\_16b, contains an aEF-2 paralog. Therefore, the current data is insufficient  
377 to resolve the puzzling pattern of EF-2 evolution in the Bathyarchaeota phylum.

378         Finally, in our analysis, eEF-2, Ria1 and Snu114 were found to form a highly supported  
379 monophyletic group that emerged as a sister group to the aEF-2 proteins encoded by the  
380 genomes comprising the Heimdallarchaeote LC3 clade (LC3 and B3).

381 Close inspection of the EF-2 sequence alignment revealed that eukaryotic and LC3 EF-2  
382 homologs share common indels to the exclusion of all other archaeal EF-2 family protein  
383 sequences (Supplementary Fig. S6, Supplementary Fig. S7). Notably, these highly conserved

384 indels were found to be encoded by the genomic bins of two distantly related members of the  
385 Heimdallarchaeota LC3 lineage, which were independently assembled and binned from  
386 geographically distinct metagenomes (Spang, et al. 2015; Zaremba-Niedzwiedzka, et al. 2017).  
387 This refutes recently raised claims stating that these indels in Heimdallarchaeote LC3 may be the  
388 results of contamination from eukaryotes (Da Cunha, et al. 2017) while supporting the sister-  
389 relationship of eukaryotes and Asgard archaea (Eme, et al. 2017; Spang, et al. ; Spang, et al.  
390 2015; Zaremba-Niedzwiedzka, et al. 2017). In addition, despite the low sequence identity of  
391 39%, the high-confidence modeled structure of Heimdallarchaeote LC3 EF-2 was highly similar  
392 to *Drosophila melanogaster* eEF-2 (RMSD (root-mean-square deviation) 1.3Å across all 796  
393 residues to *D. melanogaster* structural model PDB 4V6W (Anger, et al. 2013); Supplementary  
394 File S1). By comparison, the Heimdallarchaeote AB-125 model aligns less confidently to the  
395 *Drosophila* EF-2 structure (RMSD 16.4Å). The observed phylogenetic topology and the presence  
396 of the full complement of *dph* biosynthesis genes in LC3 genomes (Figs. 1 and 2), support an  
397 evolutionary scenario in which Heimdallarchaeote LC3 and eukaryotes share a common ancestry  
398 with EF-2 being vertically inherited from this archaeal ancestor.

399

## 400 **DISCUSSION**

401 The use of metagenomic approaches has led to an expansion of genomic data from a large  
402 diversity of previously unknown archaeal and bacterial lineages and has changed our perception  
403 of the tree of life, microbial metabolic diversity and evolution, as well as the origin of eukaryotes  
404 (Brown, et al. 2015; Castelle, et al. 2015; Hug, et al. 2016; Parks, et al. 2017; Spang, et al. 2015;  
405 Zaremba-Niedzwiedzka, et al. 2017). Since most of what is known about archaeal informational  
406 processing machineries is based on a few model organisms, we aimed to use the expansion of

407 genomic data to investigate key elements of the translational machinery - EF-2 and  
408 diphthamidylation - across the tree of life.

409 Our analyses of archaeal EF-2 family proteins and the distribution of diphthamide  
410 biosynthesis genes have revealed unusual features of the core translation machinery in several  
411 archaeal lineages. These findings negate two long-held assumptions regarding the archaeal and  
412 eukaryotic translation machineries, with both functional and evolutionary implications. First, we  
413 show that diphthamide modification is not universally conserved across Archaea and eukaryotes.  
414 Second, we demonstrate that, much like Bacteria and eukaryotes (Atkinson 2015), the archaeal  
415 EF-2 protein family has undergone several gene duplication events, presumably coupled to  
416 functional differentiation of EF-2 paralogs, throughout archaeal evolution.

417 The evolution of archaeal diphthamide biosynthesis and EF-2 is especially intriguing in  
418 the context of eukaryogenesis. Recent findings based on comparative genomics indicate that  
419 eukaryotes evolved from a symbiosis between an alphaproteobacterium with an archaeal host  
420 that shares a most recent common ancestor with extant members of the Asgard archaea, possibly  
421 a Heimdallarchaeota-related lineage (Spang, et al. 2015; Zaremba-Niedzwiedzka, et al. 2017).  
422 Our study adds additional data to support this scenario by revealing close sequence and predicted  
423 structural similarity of canonical EF-2 proteins of the Heimdallarchaeote LC3 lineage and  
424 eukaryotic EF-2 proteins, including shared indels. Furthermore, phylogenetic analyses of EF-2  
425 family proteins reveals that EF-2 of the Heimdallarchaeote LC3 lineage forms a monophyletic  
426 group with EF-2 family proteins of eukaryotes, and therefore suggests that the archaeal ancestor  
427 of eukaryotes was equipped with an EF-2 protein similar to the homologs found in this lineage.  
428 The subsequent evolution of the eukaryotic EF-2 family appears to have included at least two  
429 ancient duplication events leading to Rial and Snu14. Importantly, the presence of

430 characteristic eukaryotic indels in EF-2 of all members of the Heimdallarchaeote LC3 lineage  
431 further strengthens this hypothesis and underlines that concerns raised about the quality of these  
432 genomic bins (Da Cunha, et al. 2017) are unjustified (Spang, et al.).

433 In addition, the LC3 clade also represents the sole group within the Asgard archaea that is  
434 characterized by the presence of the full complement of archaeal diphthamide biosynthesis  
435 pathway genes. However, while phylogenetic analyses of Dph1/2 show weak support for a sister-  
436 relationship between Heimdallarchaeota and eukaryotes, eukaryotic Dph5 appears to be most  
437 closely related to homologs of Woese archaeota (Supplementary Fig. S8, Supplementary File  
438 S3), an archaeal lineage belonging to the proposed DPANN superphylum (Castelle, et al. 2015;  
439 Rinke, et al. 2013; Williams, et al. 2017), comprising various additional lineages with putative  
440 symbiotic and/or parasitic members (reviewed in Spang et al. (Spang, et al. 2017)). Notably, a  
441 previous study has also revealed an affiliation of some eukaryotic tRNA synthetases with  
442 DPANN archaea (Furukawa, et al. 2017). Given that several DPANN lineages infect or closely  
443 associate with other archaeal lineages, they may exchange genes with their hosts frequently, as  
444 was shown for *Nanoarchaeum equitans* and its crenarchaeal host *Ignicoccus hospitalis* (Podar, et  
445 al. 2008). Following a similar reasoning, the archaeal ancestor of eukaryotes (i.e. a relative of the  
446 Asgard archaea) may have acquired genes (e.g. *dph5*) from an ancestral  
447 DPANN/Woese archaeota symbiont. However, prospective analyses and generation of genomic  
448 data from additional members of the Asgard and DPANN archaea are necessary to test this  
449 hypothesis and to clarify the evolutionary history of the origin of diphthamide biosynthesis genes  
450 in eukaryotes.

451 Furthermore, our findings have practical implications for studies that involve  
452 phylogenetic and metagenomic analyses. Previously, EF-2 has been widely used as a

453 phylogenetic marker, in both single-gene (Baldauf, et al. 1996; Elkins, et al. 2008; Hashimoto  
454 and Hasegawa 1996; Iwabe, et al. 1989), and multiple-gene alignments of universal single copy  
455 genes [(Guy, et al. 2014; Raymann, et al. 2015; Williams, et al. 2012), and others] to assess the  
456 relationships between Archaea, Bacteria and eukaryotes. However, the presence of paralogs of  
457 EF-2 in various Archaea and eukaryotes suggest that EF-2 should be excluded from such  
458 datasets. In addition, EF-2, Dph1/2, and Dph5 are part of single-copy marker gene sets regularly  
459 used to estimate genome completeness and purity of archaeal metagenomic bins (Parks, et al.  
460 2015; Wu and Scott 2012). The presence of duplicated aEF-2 gene families, the absence of *dph*  
461 genes in most Asgard archaea, *Geoarchaea* and *Korarchaeota*, and the presence of two split  
462 genes for Dph1/2 in DPANN makes these genes unsuited as marker genes, and should hence be  
463 excluded from marker gene sets used to assess genome completeness.

464         The observed absence of *dph* biosynthesis genes in various Archaea as well as  
465 parabasalids is surprising given that diphthamide was previously thought to be a conserved  
466 feature across Archaea and eukaryotes (Schaffrath, et al. 2014), and critical for ensuring  
467 translational fidelity (Ortiz, et al. 2006). While we currently cannot rule out the possibility that  
468 *dph*-lacking archaea and parabasalids perform the multi-step process of diphthamidylation using  
469 a set of yet-unknown enzymes, future proteomics studies will be needed to conclusively rule out  
470 the presence of diphthamide in these taxa. Yet, it is more likely that these groups have evolved a  
471 different mechanism or mechanisms to fulfill the proposed roles of diphthamide in translation.

472         Many of the *dph*-lacking archaeal genomes encode two paralogs of the aEF-2 gene.  
473 Despite the apparent absence of diphthamide, our sequence and structural modeling analyses  
474 imply that these diphthamide-deficient aEF-2 proteins are likely under strong selective pressure to  
475 maintain translocase function. In contrast, analyses of the aEF-2p suggest that, while this paralog

476 is a member of the translational GTPase superfamily, aEF-2p is unlikely to function in the same  
477 manner as canonical aEF-2. In fact, the complete lack of sequence conservation in aEF-2p key  
478 domain IV loop residues indicates that these paralogs are not likely to act as translocases (Fig. 3,  
479 Supplementary Fig. S2a) (Ortiz, et al. 2006; Rodnina, et al. 1997) and instead perform alternative  
480 roles. For instance, it seems possible that aEF-2p may compensate for the absence of  
481 diphthamide in at least some *dph*-lacking lineages. However, other functions for aEF-2p such as  
482 error-correcting back-translocation or ribosome recycling also seem possible, given the observed  
483 sub- and neo-functionalizations seen in eukaryotic and bacterial EF-2/EF-G paralogs (Qin, et al.  
484 2006; Tsuboi, et al. 2009). Alternatively, given proposed regulation of translation via ADP-  
485 ribosylation of diphthamide (Schaffrath, et al. 2014) and a role of diphthamide in responding to  
486 oxidative stress (Argüelles, et al. 2014; Argüelles, et al. 2013), aEF-2p could perform another,  
487 yet unknown role in translation regulation.

488         Currently, the consequences for the absence of *dph* biosynthesis genes in parabasalids  
489 and in several Archaea remain unclear. Future studies could gain insight into such questions by  
490 studying translation in the genetically tractable parabasalid *Trichomonas vaginalis*, whose cell  
491 biology and metabolism has been extensively studied. In addition, acquisition of additional  
492 sequencing data or enrichment cultures from members of the Asgard superphylum,  
493 *Korarchaeota*, and other novel archaeal lineages will lead to a better understanding of the  
494 evolution and function of EF-2 family proteins, and the absence of *dph* biosynthesis genes.

495

## 496 **ACKNOWLEDGEMENTS**

497 We thank Jordan Angle, Kay Stefanik, Rebecca Daly, and Kelly Wrighton for assistance with  
498 sampling of OWC sediments, and Felix Homa for computational support. Sequencing of OWC

499 metagenomes was conducted in part by the U.S. Department of Energy Joint Genome Institute, a  
500 DOE Office of Science User Facility that is supported by the Office of Science of the U.S.  
501 Department of Energy under Contract No. DE-AC02-05CH11231. Sequencing of Aarhus bay  
502 metagenomes was performed by the National Genomics Infrastructure sequencing platforms at  
503 the Science for Life Laboratory at Uppsala University, a national infrastructure supported by the  
504 Swedish Research Council (VR-RFI) and the Knut and Alice Wallenberg Foundation. We thank  
505 the Uppsala Multidisciplinary Center for Advanced Computational Science (UPPMAX) at  
506 Uppsala University and the Swedish National Infrastructure for Computing (SNIC) at the PDC  
507 Center for High-Performance Computing for providing computational resources. This work was  
508 supported by grants of the European Research Council (ERC Starting grant 310039-  
509 PUZZLE\_CELL), the Swedish Foundation for Strategic Research (SSF-FFL5) and the Swedish  
510 Research Council (VR grant 2015-04959) to T.J.G.E.. C.W.S. is supported by a European  
511 Molecular Biology Organisation long-term fellowship (ALTF-997-2015) and the Natural  
512 Sciences and Engineering Research Council of Canada postdoctoral research fellowship (PDF-  
513 487174-2016).

514

## 515 REFERENCES

- 516 Adam PS, Borrel G, Brochier-Armanet C, Gribaldo S 2017. The growing tree of Archaea: new  
517 perspectives on their diversity, evolution and ecology. *ISME J* 11: 2407-2425. doi:  
518 10.1038/ismej.2017.122
- 519 Albertsen M, et al. 2013. Genome sequences of rare, uncultured bacteria obtained by differential  
520 coverage binning of multiple metagenomes. *Nat Biotechnol* 31: 533-538. doi: 10.1038/nbt.2579
- 521 Alneberg J, et al. 2014. Binning metagenomic contigs by coverage and composition. *Nat*  
522 *Methods* 11: 1144-1146. doi: 10.1038/nmeth.3103

- 523 Anger AM, et al. 2013. Structures of the human and *Drosophila* 80S ribosome. *Nature* 497: 80-  
524 85. doi: 10.1038/nature12104
- 525 Argüelles S, Camandola S, Cutler RG, Ayala A, Mattson MP 2014. Elongation factor 2  
526 diphthamide is critical for translation of two IRES-dependent protein targets, XIAP and FGF2,  
527 under oxidative stress conditions. *Free Radic Biol Med* 67: 131-138. doi:  
528 10.1016/j.freeradbiomed.2013.10.015
- 529 Argüelles S, et al. 2013. Molecular control of the amount, subcellular location, and activity state  
530 of translation elongation factor 2 in neurons experiencing stress. *Free Radic Biol Med* 61: 61-71.  
531 doi: 10.1016/j.freeradbiomed.2013.03.016
- 532 Atkinson GC 2015. The evolutionary and functional diversity of classical and lesser-known  
533 cytoplasmic and organellar translational GTPases across the tree of life. *BMC Genomics* 16: 78.  
534 doi: 10.1186/s12864-015-1289-7
- 535 Baldauf SL, Palmer JD, Doolittle WF 1996. The root of the universal tree and the origin of  
536 eukaryotes based on elongation factor phylogeny. *Proc Natl Acad Sci U S A* 93: 7749-7754.
- 537 Bankevich A, et al. 2012. SPAdes: a new genome assembly algorithm and its applications to  
538 single-cell sequencing. *J Comput Biol* 19: 455-477. doi: 10.1089/cmb.2012.0021
- 539 Becam AM, Nasr F, Racki WJ, Zagulski M, Herbert CJ 2001. Ria1p (Ynl163c), a protein similar  
540 to elongation factors 2, is involved in the biogenesis of the 60S subunit of the ribosome in  
541 *Saccharomyces cerevisiae*. *Mol Genet Genomics* 266: 454-462. doi: 10.1007/s004380100548
- 542 Blaby IK, et al. 2010. Towards a systems approach in the genetic analysis of archaea:  
543 Accelerating mutant construction and phenotypic analysis in *Haloferax volcanii*. *Archaea* 2010:  
544 426239. doi: 10.1155/2010/426239
- 545 Bolger AM, Lohse M, Usadel B 2014. Trimmomatic: a flexible trimmer for Illumina sequence  
546 data. *Bioinformatics* 30: 2114-2120. doi: 10.1093/bioinformatics/btu170
- 547 Botet J, Rodriguez-Mateos M, Ballesta JP, Revuelta JL, Remacha M 2008. A chemical genomic  
548 screen in *Saccharomyces cerevisiae* reveals a role for diphthamidation of translation elongation  
549 factor 2 in inhibition of protein synthesis by sordarin. *Antimicrob Agents Chemother* 52: 1623-  
550 1629. doi: 10.1128/AAC.01603-07
- 551 Bray NL, Pimentel H, Melsted P, Pachter L 2016. Near-optimal probabilistic RNA-seq  
552 quantification. *Nat Biotechnol* 34: 525-527. doi: 10.1038/nbt.3519



553 Brown CT, et al. 2015. Unusual biology across a group comprising more than 15% of domain  
554 Bacteria. *Nature* 523: 208-211. doi: 10.1038/nature14486

555 Capella-Gutierrez S, Silla-Martinez JM, Gabaldon T 2009. trimAl: a tool for automated  
556 alignment trimming in large-scale phylogenetic analyses. *Bioinformatics* 25: 1972-1973. doi:  
557 10.1093/bioinformatics/btp348

558 Castelle CJ, et al. 2015. Genomic expansion of domain archaea highlights roles for organisms  
559 from new phyla in anaerobic carbon cycling. *Curr Biol* 25: 690-701. doi:  
560 10.1016/j.cub.2015.01.014

561 Corradi N, Pombert JF, Farinelli L, Didier ES, Keeling PJ 2010. The complete sequence of the  
562 smallest known nuclear genome from the microsporidian *Encephalitozoon intestinalis*. *Nat*  
563 *Commun* 1: 77. doi: 10.1038/ncomms1082

564 Criscuolo A, Gribaldo S 2010. BMGE (Block Mapping and Gathering with Entropy): a new  
565 software for selection of phylogenetic informative regions from multiple sequence alignments.  
566 *BMC Evol Biol* 10: 210. doi: 10.1186/1471-2148-10-210

567 Crooks GE, Hon G, Chandonia JM, Brenner SE 2004. WebLogo: a sequence logo generator.  
568 *Genome Res* 14: 1188-1190. doi: 10.1101/gr.849004

569 Da Cunha V, Gaia M, Gadelle D, Nasir A, Forterre P 2017. Lokiarchaea are close relatives of  
570 Euryarchaeota, not bridging the gap between prokaryotes and eukaryotes. *PLoS Genet* 13:  
571 e1006810. doi: 10.1371/journal.pgen.1006810

572 de Crécy-Lagard V, Forouhar F, Brochier-Armanet C, Tong L, Hunt JF 2012. Comparative  
573 genomic analysis of the DUF71/COG2102 family predicts roles in diphthamide biosynthesis and  
574 B12 salvage. *Biol Direct* 7: 32. doi: 10.1186/1745-6150-7-32

575 Dick GJ, et al. 2009. Community-wide analysis of microbial genome sequence signatures.  
576 *Genome Biol* 10: R85. doi: 10.1186/gb-2009-10-8-r85

577 Donhofer A, et al. 2012. Structural basis for TetM-mediated tetracycline resistance. *Proc Natl*  
578 *Acad Sci U S A* 109: 16900-16905. doi: 10.1073/pnas.1208037109

579 Eddy SR 2011. Accelerated Profile HMM Searches. *PLoS Comput Biol* 7: e1002195. doi:  
580 10.1371/journal.pcbi.1002195

581 Elkins JG, et al. 2008. A korarchaeal genome reveals insights into the evolution of the Archaea.  
582 *Proceedings of the National Academy of Sciences* 105: 8102-8107. doi:  
583 10.1073/pnas.0801980105

- 584 Eme L, Spang A, Lombard J, Stairs CW, Ettema TJG 2017. Archaea and the origin of  
585 eukaryotes. *Nature Reviews Microbiology* 15: 711. doi: 10.1038/nrmicro.2017.133
- 586 Eren AM, et al. 2015. Anvi'o: an advanced analysis and visualization platform for 'omics data.  
587 *PeerJ* 3: e1319. doi: 10.7717/peerj.1319
- 588 Evans PN, et al. 2015. Methane metabolism in the archaeal phylum Bathyarchaeota revealed by  
589 genome-centric metagenomics. *Science* 350: 434-438. doi: 10.1126/science.aac7745
- 590 Fabrizio P, Laggerbauer B, Lauber J, Lane WS, Luhrmann R 1997. An evolutionarily conserved  
591 U5 snRNP-specific protein is a GTP-binding factor closely related to the ribosomal translocase  
592 EF-2. *EMBO J* 16: 4092-4106. doi: 10.1093/emboj/16.13.4092
- 593 Freistroffer DV, Pavlov MY, MacDougall J, Buckingham RH, Ehrenberg M 1997. Release  
594 factor RF3 in E.coli accelerates the dissociation of release factors RF1 and RF2 from the  
595 ribosome in a GTP-dependent manner. *EMBO J* 16: 4126-4133. doi: 10.1093/emboj/16.13.4126
- 596 Fu L, Niu B, Zhu Z, Wu S, Li W 2012. CD-HIT: accelerated for clustering the next-generation  
597 sequencing data. *Bioinformatics* 28: 3150-3152. doi: 10.1093/bioinformatics/bts565
- 598 Furukawa R, Nakagawa M, Kuroyanagi T, Yokobori SI, Yamagishi A 2017. Quest for Ancestors  
599 of Eukaryal Cells Based on Phylogenetic Analyses of Aminoacyl-tRNA Synthetases. *J Mol Evol*  
600 84: 51-66. doi: 10.1007/s00239-016-9768-2
- 601 Guy L, Saw JH, Ettema TJ 2014. The archaeal legacy of eukaryotes: a phylogenomic  
602 perspective. *Cold Spring Harb Perspect Biol* 6: a016022. doi: 10.1101/cshperspect.a016022
- 603 Hashimoto T, Hasegawa M 1996. Origin and early evolution of eukaryotes inferred from the  
604 amino acid sequences of translation elongation factors 1alpha/Tu and 2/G. *Adv Biophys* 32: 73-  
605 120.
- 606 He Y, et al. 2016. Genomic and enzymatic evidence for acetogenesis among multiple lineages of  
607 the archaeal phylum Bathyarchaeota widespread in marine sediments. *Nature Microbiology* 1:  
608 16035. doi: 10.1038/nmicrobiol.2016.35
- 609 Hoang DT, Chernomor O, von Haeseler A, Minh BQ, Vinh LS 2018. UFBoot2: Improving the  
610 Ultrafast Bootstrap Approximation. *Mol Biol Evol* 35: 518-522. doi: 10.1093/molbev/msx281
- 611 Hug LA, et al. 2016. A new view of the tree of life. *Nature Microbiology* 1. doi: Artn 16048  
612 10.1038/Nmicrobiol.2016.48
- 613 Hyatt D, et al. 2010. Prodigal: prokaryotic gene recognition and translation initiation site  
614 identification. *BMC Bioinformatics* 11: 119. doi: 10.1186/1471-2105-11-119

615 Iglewski BH, Liu PV, Kabat D 1977. Mechanism of action of *Pseudomonas aeruginosa* exotoxin  
616 A:adenosine diphosphate-ribosylation of mammalian elongation factor 2 in vitro and in vivo.  
617 *Infect Immun* 15: 138-144.

618 Iwabe N, Kuma K, Hasegawa M, Osawa S, Miyata T 1989. Evolutionary relationship of  
619 archaeobacteria, eubacteria, and eukaryotes inferred from phylogenetic trees of duplicated genes.  
620 *Proc Natl Acad Sci U S A* 86: 9355-9359.

621 Jorgensen R, et al. 2008. Cholix toxin, a novel ADP-ribosylating factor from *Vibrio cholerae*. *J*  
622 *Biol Chem* 283: 10671-10678. doi: 10.1074/jbc.M710008200

623 Katoh K, Standley DM 2013. MAFFT multiple sequence alignment software version 7:  
624 improvements in performance and usability. *Mol Biol Evol* 30: 772-780. doi:  
625 10.1093/molbev/mst010

626 Kimata Y, Kohno K 1994. Elongation factor 2 mutants deficient in diphthamide formation show  
627 temperature-sensitive cell growth. *J Biol Chem* 269: 13497-13501.

628 Lane CE, et al. 2007. Nucleomorph genome of *Hemiselmis andersenii* reveals complete intron  
629 loss and compaction as a driver of protein structure and function. *Proc Natl Acad Sci U S A* 104:  
630 19908-19913. doi: 10.1073/pnas.0707419104

631 Langmead B, Salzberg SL 2012. Fast gapped-read alignment with Bowtie 2. *Nat Methods* 9:  
632 357-359. doi: 10.1038/nmeth.1923

633 Lazar CS, et al. 2016. Genomic evidence for distinct carbon substrate preferences and ecological  
634 niches of Bathyarchaeota in estuarine sediments. *Environ Microbiol* 18: 1200-1211. doi:  
635 10.1111/1462-2920.13142

636 Li D, Liu CM, Luo R, Sadakane K, Lam TW 2015. MEGAHIT: an ultra-fast single-node  
637 solution for large and complex metagenomics assembly via succinct de Bruijn graph.  
638 *Bioinformatics* 31: 1674-1676. doi: 10.1093/bioinformatics/btv033

639 Li L, et al. 2014. Ribosomal elongation factor 4 promotes cell death associated with lethal stress.  
640 *MBio* 5: e01708. doi: 10.1128/mBio.01708-14

641 Lin HH, Liao YC 2016. Accurate binning of metagenomic contigs via automated clustering  
642 sequences using information of genomic signatures and marker genes. *Sci Rep* 6: 24175. doi:  
643 10.1038/srep24175

644 Liu S, et al. 2006. Dph3, a small protein required for diphthamide biosynthesis, is essential in  
645 mouse development. *Mol Cell Biol* 26: 3835-3841. doi: 10.1128/MCB.26.10.3835-3841.2006

- 646 Makarova KS, Wolf YI, Koonin EV 2015. Archaeal Clusters of Orthologous Genes (arCOGs):  
647 An Update and Application for Analysis of Shared Features between Thermococcales,  
648 Methanococcales, and Methanobacteriales. *Life (Basel)* 5: 818-840. doi: 10.3390/life5010818
- 649 Meng J, et al. 2014. Genetic and functional properties of uncultivated MCG archaea assessed by  
650 metagenome and gene expression analyses. *ISME J* 8: 650-659. doi: 10.1038/ismej.2013.174
- 651 Morrison HG, et al. 2007. Genomic minimalism in the early diverging intestinal parasite *Giardia*  
652 *lamblia*. *Science* 317: 1921-1926. doi: 10.1126/science.1143837
- 653 Murray J, et al. 2016. Structural characterization of ribosome recruitment and translocation by  
654 type IV IRES. *Elife* 5. doi: 10.7554/eLife.13567
- 655 Narowe AB, et al. 2017. High-resolution sequencing reveals unexplored archaeal diversity in  
656 freshwater wetland soils. *Environ Microbiol* 19: 2192-2209. doi: 10.1111/1462-2920.13703
- 657 Nguyen LT, Schmidt HA, von Haeseler A, Minh BQ 2015. IQ-TREE: a fast and effective  
658 stochastic algorithm for estimating maximum-likelihood phylogenies. *Mol Biol Evol* 32: 268-  
659 274. doi: 10.1093/molbev/msu300
- 660 Ortiz PA, Ulloque R, Kihara GK, Zheng H, Kinzy TG 2006. Translation elongation factor 2  
661 anticodon mimicry domain mutants affect fidelity and diphtheria toxin resistance. *J Biol Chem*  
662 281: 32639-32648. doi: 10.1074/jbc.M607076200
- 663 Ounit R, Wanamaker S, Close TJ, Lonardi S 2015. CLARK: fast and accurate classification of  
664 metagenomic and genomic sequences using discriminative k-mers. *BMC Genomics* 16: 236. doi:  
665 10.1186/s12864-015-1419-2
- 666 Parks DH, Imelfort M, Skennerton CT, Hugenholtz P, Tyson GW 2015. CheckM: assessing the  
667 quality of microbial genomes recovered from isolates, single cells, and metagenomes. *Genome*  
668 *Res* 25: 1043-1055. doi: 10.1101/gr.186072.114
- 669 Parks DH, et al. 2017. Recovery of nearly 8,000 metagenome-assembled genomes substantially  
670 expands the tree of life. *Nature Microbiology* 2: 1533-1542. doi: 10.1038/s41564-017-0012-7
- 671 Peng Y, Leung HC, Yiu SM, Chin FY 2012. IDBA-UD: a de novo assembler for single-cell and  
672 metagenomic sequencing data with highly uneven depth. *Bioinformatics* 28: 1420-1428. doi:  
673 10.1093/bioinformatics/bts174
- 674 Pettersen EF, et al. 2004. UCSF Chimera--a visualization system for exploratory research and  
675 analysis. *J Comput Chem* 25: 1605-1612. doi: 10.1002/jcc.20084

- 676 Podar M, et al. 2008. A genomic analysis of the archaeal system *Ignicoccus hospitalis*-  
677 *Nanoarchaeum equitans*. *Genome Biol* 9: R158. doi: 10.1186/gb-2008-9-11-r158
- 678 Qin Y, et al. 2006. The highly conserved LepA is a ribosomal elongation factor that back-  
679 translocates the ribosome. *Cell* 127: 721-733. doi: 10.1016/j.cell.2006.09.037
- 680 Raymann K, Brochier-Armanet C, Gribaldo S 2015. The two-domain tree of life is linked to a  
681 new root for the Archaea. *Proc Natl Acad Sci U S A* 112: 6670-6675. doi:  
682 10.1073/pnas.1420858112
- 683 Rinke C, et al. 2013. Insights into the phylogeny and coding potential of microbial dark matter.  
684 *Nature* 499: 431-437. doi: 10.1038/nature12352
- 685 Rodnina MV, Savelsbergh A, Katunin VI, Wintermeyer W 1997. Hydrolysis of GTP by  
686 elongation factor G drives tRNA movement on the ribosome. *Nature* 385: 37-41. doi:  
687 10.1038/385037a0
- 688 Roy A, Yang J, Zhang Y 2012. COFACTOR: an accurate comparative algorithm for structure-  
689 based protein function annotation. *Nucleic Acids Res* 40: W471-477. doi: 10.1093/nar/gks372
- 690 Schaffrath R, Abdel-Fattah W, Klassen R, Stark MJ 2014. The diphthamide modification  
691 pathway from *Saccharomyces cerevisiae*--revisited. *Mol Microbiol* 94: 1213-1226. doi:  
692 10.1111/mmi.12845
- 693 Spahn CM, et al. 2004. Domain movements of elongation factor eEF2 and the eukaryotic 80S  
694 ribosome facilitate tRNA translocation. *EMBO J* 23: 1008-1019. doi: 10.1038/sj.emboj.7600102
- 695 Spang A, Caceres EF, Ettema TJG 2017. Genomic exploration of the diversity, ecology, and  
696 evolution of the archaeal domain of life. *Science* 357. doi: 10.1126/science.aaf3883
- 697 Spang A, et al. Asgard archaea are the closest prokaryotic relatives of eukaryotes. *PLoS Genetics*  
698 forthcoming.
- 699 Spang A, et al. 2015. Complex archaea that bridge the gap between prokaryotes and eukaryotes.  
700 *Nature* 521: 173-+. doi: 10.1038/nature14447
- 701 Su X, et al. 2012a. YBR246W is required for the third step of diphthamide biosynthesis. *J Am*  
702 *Chem Soc* 134: 773-776. doi: 10.1021/ja208870a
- 703 Su X, et al. 2012b. Chemogenomic approach identified yeast YLR143W as diphthamide  
704 synthetase. *Proc Natl Acad Sci U S A* 109: 19983-19987. doi: 10.1073/pnas.1214346109

705 Suematsu T, et al. 2010. A bacterial elongation factor G homologue exclusively functions in  
706 ribosome recycling in the spirochaete *Borrelia burgdorferi*. *Mol Microbiol* 75: 1445-1454. doi:  
707 10.1111/j.1365-2958.2010.07067.x

708 Suzek BE, et al. 2015. UniRef clusters: a comprehensive and scalable alternative for improving  
709 sequence similarity searches. *Bioinformatics* 31: 926-932. doi: 10.1093/bioinformatics/btu739

710 Tsuboi M, et al. 2009. EF-G2mt is an exclusive recycling factor in mammalian mitochondrial  
711 protein synthesis. *Mol Cell* 35: 502-510. doi: 10.1016/j.molcel.2009.06.028

712 Uthman S, et al. 2013. The amidation step of diphthamide biosynthesis in yeast requires DPH6, a  
713 gene identified through mining the DPH1-DPH5 interaction network. *PLoS Genet* 9: e1003334.  
714 doi: 10.1371/journal.pgen.1003334

715 Waterhouse AM, Procter JB, Martin DM, Clamp M, Barton GJ 2009. Jalview Version 2--a  
716 multiple sequence alignment editor and analysis workbench. *Bioinformatics* 25: 1189-1191. doi:  
717 10.1093/bioinformatics/btp033

718 Webb TR, et al. 2008. Diphthamide modification of eEF2 requires a J-domain protein and is  
719 essential for normal development. *J Cell Sci* 121: 3140-3145. doi: 10.1242/jcs.035550

720 Williams TA, Foster PG, Nye TM, Cox CJ, Embley TM 2012. A congruent phylogenomic signal  
721 places eukaryotes within the Archaea. *Proc Biol Sci* 279: 4870-4879. doi:  
722 10.1098/rspb.2012.1795

723 Williams TA, et al. 2017. Integrative modeling of gene and genome evolution roots the archaeal  
724 tree of life. *Proc Natl Acad Sci U S A* 114: E4602-E4611. doi: 10.1073/pnas.1618463114

725 Wu M, Scott AJ 2012. Phylogenomic analysis of bacterial and archaeal sequences with  
726 AMPHORA2. *Bioinformatics* 28: 1033-1034. doi: 10.1093/bioinformatics/bts079

727 Wu YW, Simmons BA, Singer SW 2016. MaxBin 2.0: an automated binning algorithm to  
728 recover genomes from multiple metagenomic datasets. *Bioinformatics* 32: 605-607. doi:  
729 10.1093/bioinformatics/btv638

730 Yang J, et al. 2015. The I-TASSER Suite: protein structure and function prediction. *Nat Methods*  
731 12: 7-8. doi: 10.1038/nmeth.3213

732 Yu YR, You LR, Yan YT, Chen CM 2014. Role of OVCA1/DPH1 in craniofacial abnormalities  
733 of Miller-Dieker syndrome. *Hum Mol Genet* 23: 5579-5596. doi: 10.1093/hmg/ddu273

734 Zaremba-Niedzwiedzka K, et al. 2017. Asgard archaea illuminate the origin of eukaryotic  
735 cellular complexity. *Nature* 541: 353-358. doi: 10.1038/nature21031

736 Zhang Y, Liu S, Lajoie G, Merrill AR 2008. The role of the diphthamide-containing loop within  
737 eukaryotic elongation factor 2 in ADP-ribosylation by *Pseudomonas aeruginosa* exotoxin A.  
738 *Biochem J* 413: 163-174. doi: 10.1042/BJ20071083

739

## 740 **FIGURE LEGENDS**

741 **Figure 1 - Diphthamide biosynthesis genes are conserved across most eukaryotic and**

742 **archaeal lineages.** Eukaryotic and archaeal orthologues of diphthamide biosynthesis (DPH)

743 genes were retrieved from the publicly available EGGNOG and an in-house archaeal orthologues

744 (arCOG) datasets. Complete list of genomes surveyed can be found in Supplementary File S1

745 including reduced genomes from nucleomorphs (not shown on figure). Total number of genomes

746 surveyed are shown next to each group. Since Dph4 is a member of the large DNAJ-containing

747 protein family, we could not unequivocally identify this protein based on orthology alone and is

748 therefore excluded from the figure. <sup>†</sup>No arCOG available for DPH3. \*All eukaryotic genomes

749 are complete except five deeply-sequenced transcriptomes from Parabasalia; dark and light grey

750 circles indicate whether homologues were detected in more or less than 50% of the genomes

751 surveyed respectively; yellow circles indicate the absence of a detectable homologue; pink

752 circles indicate lack of conservation of the diphthamide modification motif; half-circles indicate

753 the presence of multiple copies of EF-2 with and without the conserved diphthamide

754 modification motif. 1 - Homologue detected in the original assembly (ABR\_125(Zaremba-

755 Niedzwiedzka, et al. 2017)) but not in the reassembly (ABR16 genome); a closer inspection of

756 the contig revealed that it is chimeric and will thus be removed from the final bin; 2 -

757 Homologue detected in only one Lokiarchaeota assembly (AB\_15); 3 - Several DPANN

758 genomes contain two proteins that encode the CTD and NTD of Dph1/2, respectively.

759

760 **Figure 2 - The evolution of archaeal EF-2 family proteins.** Phylogenetic tree of EF-2 family  
761 proteins based on maximum likelihood analyses of 871 aligned positions using IQ-tree. EF-2 of  
762 Bathyarchaeota grouping in an unexpected position or representing potential aEF-2p are shaded  
763 in orange. aEF-2 of Kor- and Asgard archaea are shaded in purple, while their aEF-2p are shaded  
764 in green. Highlighted amino acids show the conservation of key residues and black/white circles  
765 reveal the presence/absence of *dph* biosynthesis genes in the respective organisms/MAGs.  
766 Branch support values are based on ultrafast bootstrap approximation as well as single branch  
767 tests, respectively and are represented by differentially colored circles as detailed in the figure  
768 panel. Whenever branch support values were below 80 for any of the two methods, values have  
769 been removed and branches cannot be considered significantly supported.  
770 Scale bar indicates the number of substitutions per site. Abr.; snRNP: U5 small nuclear  
771 ribonucleoprotein EFL1: elongation factor-like GTPase ; n.c.: not conserved; p.c.: partially  
772 conserved; n.d.: not determined.

773

774 **Figure 3 - Predicted structure of Asgard archaea EF-2 and EF-2 paralogs**

775 Structural modeling of representative EF-2 genes and paralogs compared to eukaryotic EF-2  
776 structure shows conservation of overall EF-2 structure regardless of diphthamide synthesis  
777 capacity (top). The overall fold of two loops located at the tip of domain IV is conserved, but  
778 otherwise highly conserved sequence motifs in these loops are not conserved in DPH<sup>-</sup> Asgard  
779 archaea and Korarchaea or in EF-2 paralogs (middle). Bottom panels show a close-up of the key  
780 residues from the motifs, highlighting that these residues are those positioned at the tip of the  
781 domain IV loops crucial for interaction with the decoding site in canonical EF-2 structures.  
782 Histidine residue that is the site of *dph* modification is starred.



Figure 1

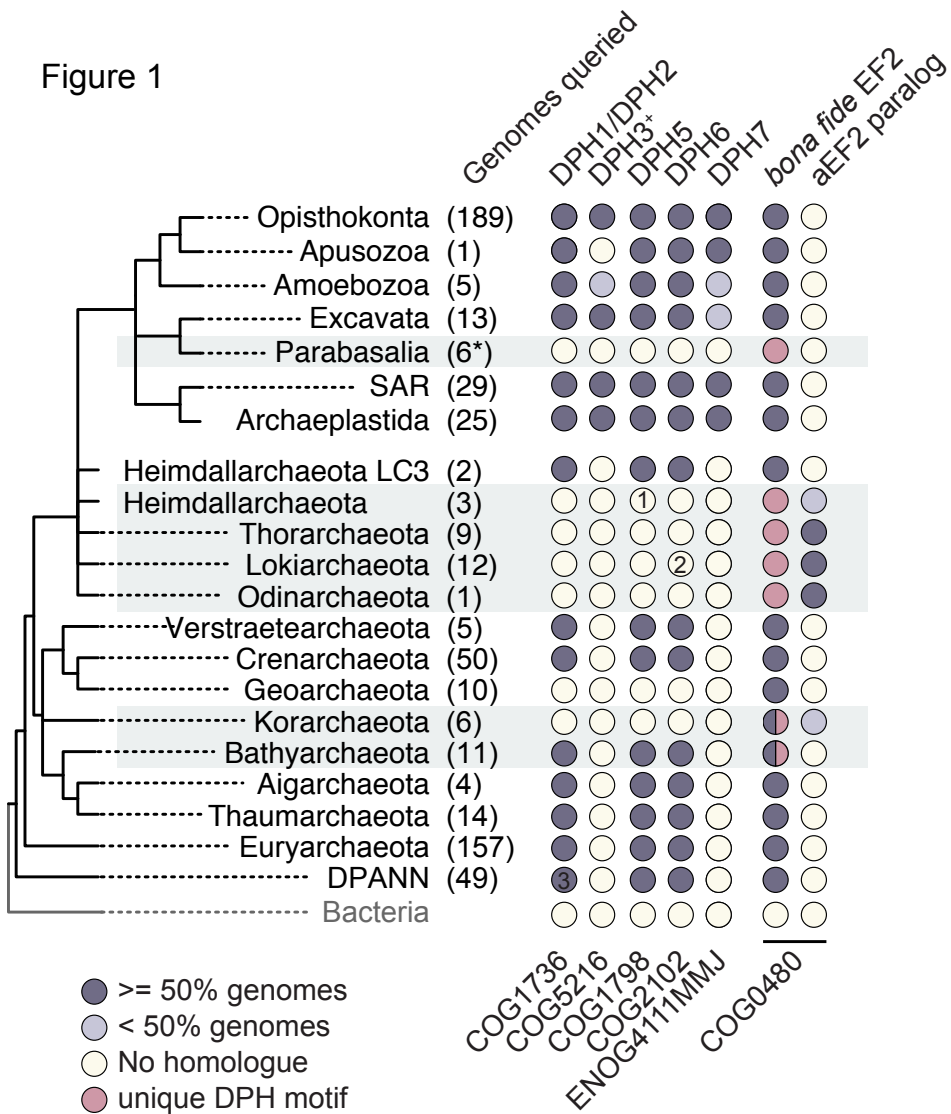

# Figure 2

bioRxiv preprint doi: <https://doi.org/10.1101/262600>; this version posted February 9, 2018. The copyright holder for this preprint (which was not certified by peer review) is the author/funder, who has granted bioRxiv a license to display the preprint in perpetuity. It is made available under aCC-BY 4.0 International license.

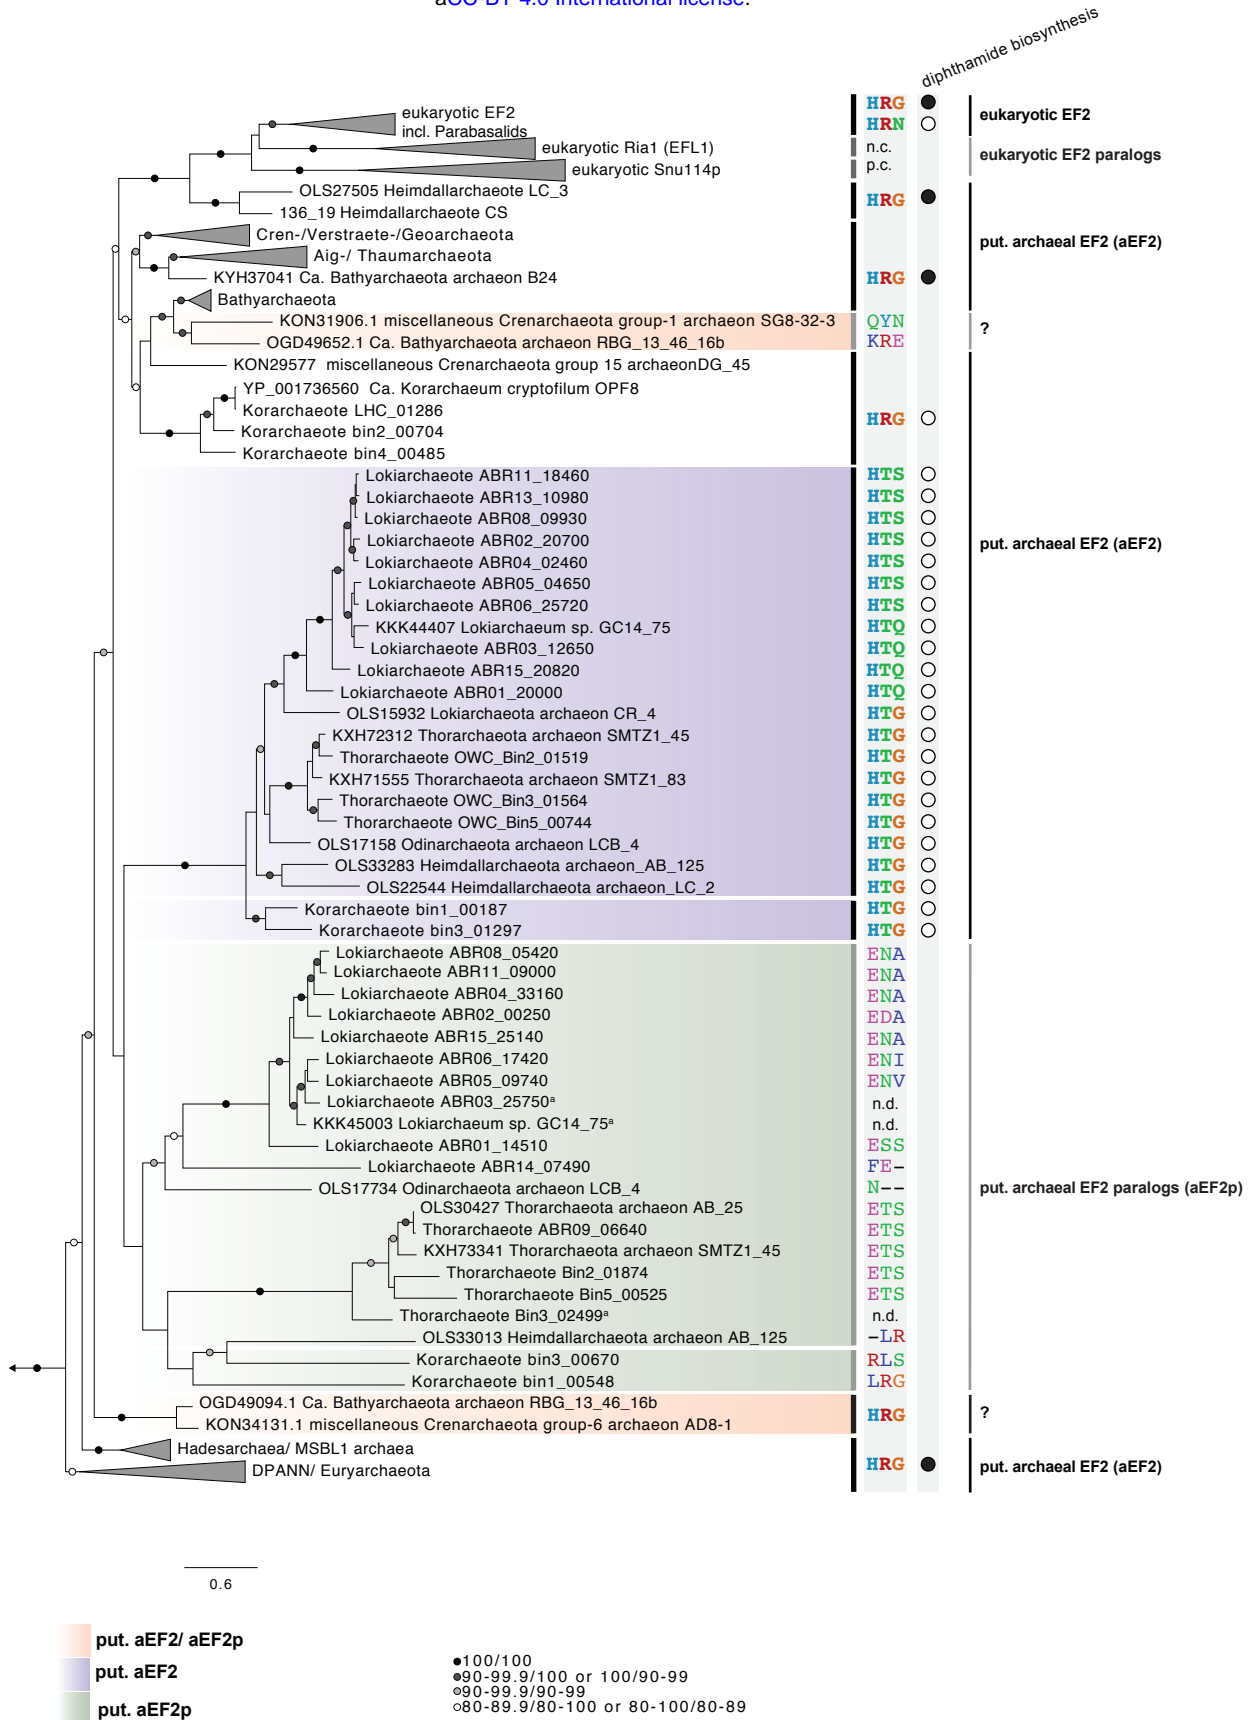

Figure 3  
 DPH<sup>+</sup> Eukaryota  
 canonical eEF-2

DPH<sup>+</sup> Archaea  
 canonical aEF-2

DPH<sup>-</sup> Asgard and Korarchaeum  
 putative EF-2

DPH<sup>-</sup> Asgard and Korarchaeum  
 EF-2 paralog

*D. melanogaster* eEF-2  
 PDB : 4v6w:Az

Hadesarchaea DG-33 aEF-2

Thorarchaeota OWC-2  
 putative EF-2

Thorarchaeota OWC-2  
 EF-2 paralog

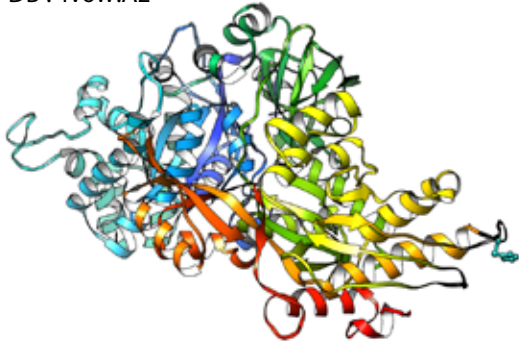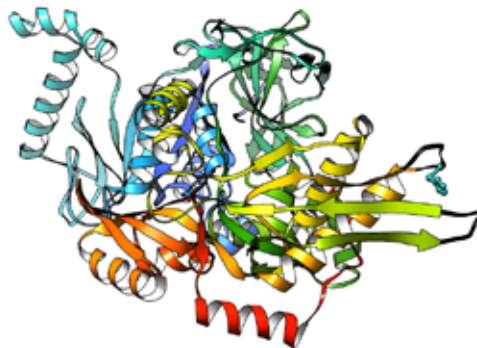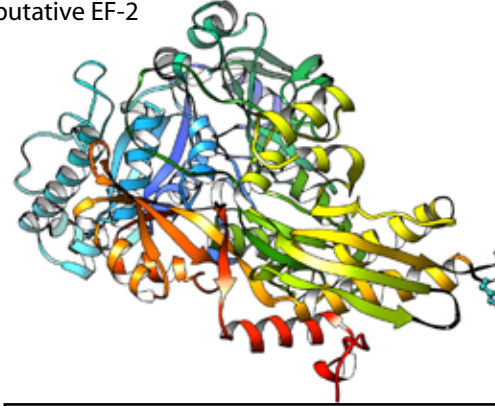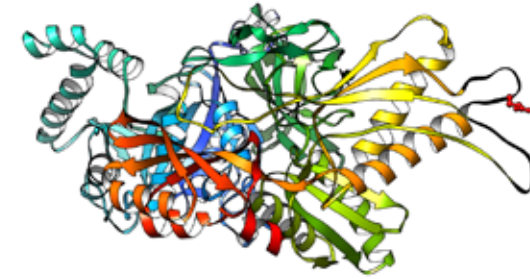

diphthamide loop \*

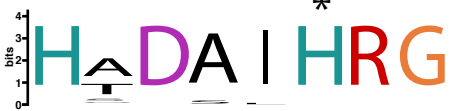

CDK-recognition loop

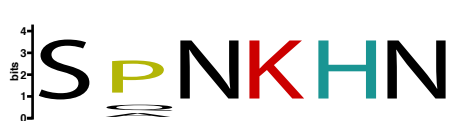

diphthamide loop \*

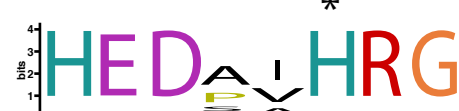

CDK-recognition loop

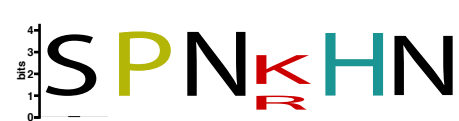

diphthamide loop \*

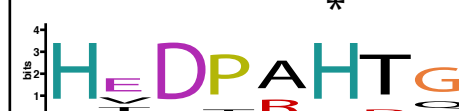

CDK-recognition loop

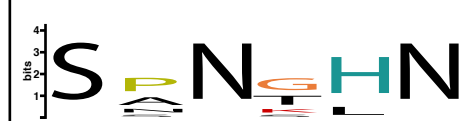

diphthamide loop

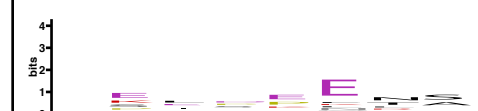

CDK-recognition loop

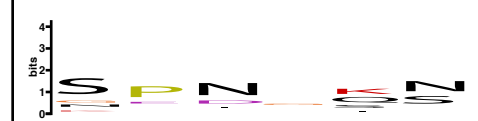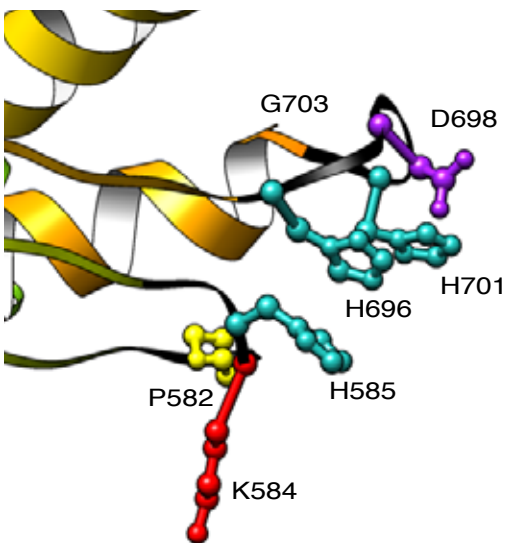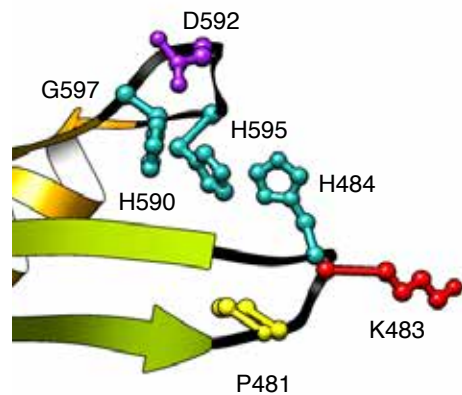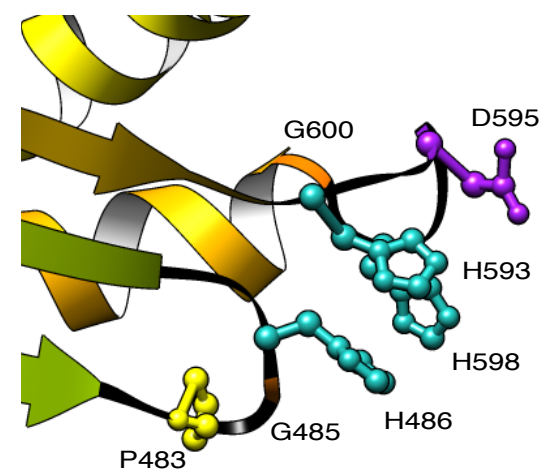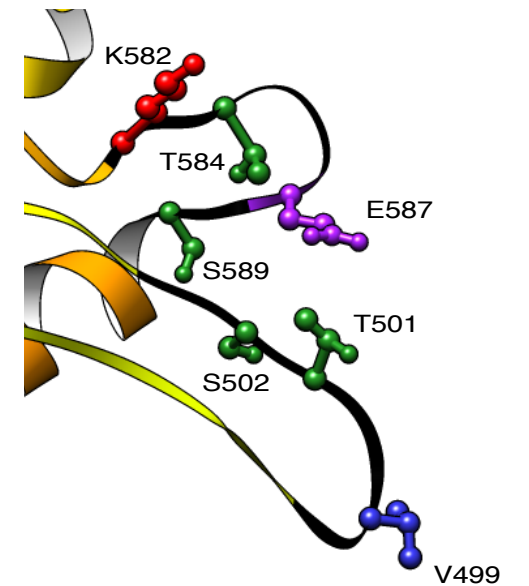

783

784 **SUPPLEMENTARY INFORMATION**

785

786 **Supplementary Figures.pdf** - Contains all supplementary figures referenced in the text.

787

788 **Supplementary File S1 - Sheet 1: Distribution of diphthamide biosynthesis genes in**

789 **archaea.** Archaeal homologues and their corresponding accession numbers for each Dph gene

790 are shown as retrieved from an in-house archaeal COG (arCOG) dataset. Total counts for each

791 archaeal group of interest are shown. **Sheet 2: Distribution of diphthamide biosynthesis genes**

792 **in eukaryotes.** Eukaryotic homologues and their corresponding accession numbers for each Dph

793 gene are shown as retrieved from EGGNOG or manual inspection. Total counts for each

794 eukaryotic supergroup are indicated in different colours. When appropriate, nucleomorph- or

795 nucleus-encoded sequences are indicated. **Sheet 3: Structural modeling results including**

796 **scoring of top structural model predicted by i-Tasser and best structural hit to that model**

797 **from PDB.**

798

799 **Supplementary File S2 - Trimmed alignment of EF-2 homologs that was used for**

800 **phylogenetic analyses.** The alignment was generated using mafft-LINSi (Kato K, Standley

801 DM. Mol Biol Evol. 30:772-80, 2013, doi:10.1093/molbev/mst010) and subjected to trimming

802 with trimAL (5%) (Capella-Gutierrez S, Silla-Martinez JM, Gabaldon T. Bioinformatics

803 25:1972-3, 2009, doi:10.1093/bioinformatics/btp348) after the manual removal of poorly aligned

804 ends. Please refer to methods section for more details.

805

806 **Supplementary File S3a - Newick file of concatenated ribosomal proteins phylogeny.** Please  
807 refer to figure legend of Fig. S1 for more details.

808

809 **Supplementary File S3b - Newick file of EF-2 phylogeny presented in Figure 2.** Please refer  
810 to figure legend of Fig. 2 for more details.

811

812 **Supplementary File S3c - Newick file of Dph1/2 phylogeny.** Please refer to figure legend of  
813 Fig. S8a for more details.

814

815 **Supplementary File S3d - Newick file of Dph5 phylogeny.** Please refer to figure legend of Fig.  
816 S8b for more details.

817

818

## Supplementary Figures for:

### Complex evolutionary history of translation Elongation Factor 2 and diphthamide biosynthesis in Archaea and parabasalids

Adrienne B. Narrowe<sup>1,†</sup>, Anja Spang<sup>2,3,†</sup>, Courtney W. Stairs<sup>2</sup>, Eva F. Caceres<sup>2</sup>, Brett J. Baker<sup>4</sup>, Christopher S. Miller<sup>1,‡,\*</sup> and Thijs J. G. Ettema<sup>2,‡</sup>

† These authors contributed equally to this work.

‡ These authors contributed equally to this work.

\* Author for correspondence: Christopher S. Miller, Department of Integrative Biology, University of Colorado Denver, Denver, CO, USA, 303-315-7665, [chris.miller@ucdenver.edu](mailto:chris.miller@ucdenver.edu)

<sup>1</sup> Department of Integrative Biology, University of Colorado Denver, Denver, Colorado, USA

<sup>2</sup> Department of Cell and Molecular Biology, Science for Life Laboratory, Uppsala University, Uppsala, Sweden

<sup>3</sup> NIOZ, Royal Netherlands Institute for Sea Research, Department of Marine Microbiology and Biogeochemistry, and Utrecht University, AB Den Burg, The Netherlands

<sup>4</sup> Department of Marine Science, Marine Science Institute, University of Texas Austin, Port Aransas, TX, USA

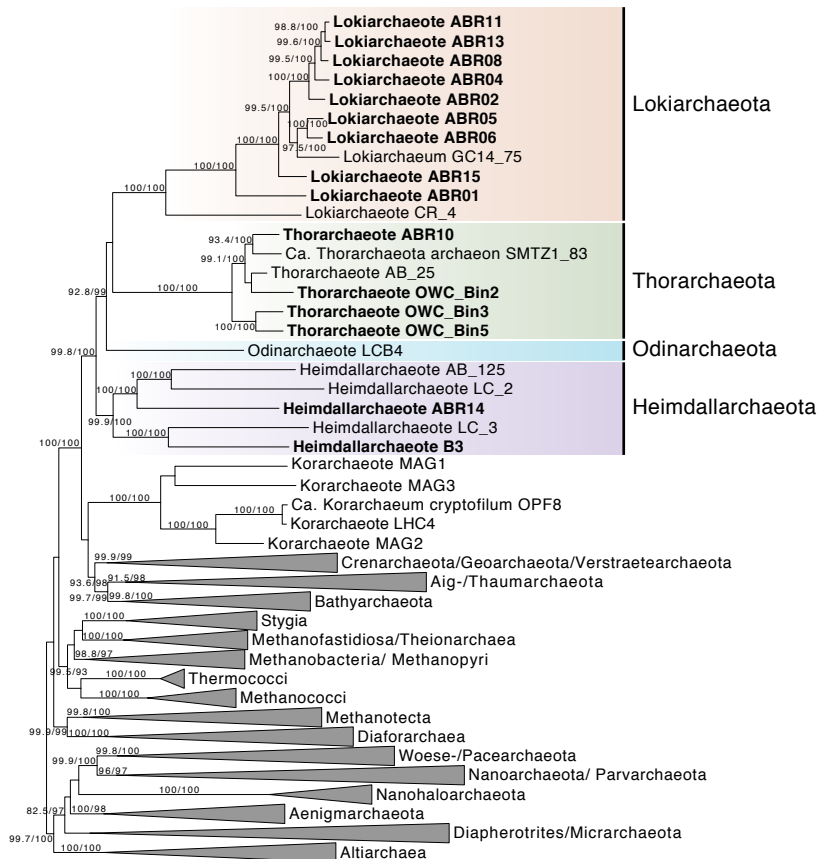

**Supplementary Fig. S1 - Phylogenetic analysis of at least 11 out of 15 concatenated archaeal ribosomal proteins (2416 AA) based on maximum likelihood analyses performed with IQ-tree.** The diverse metagenome-assembled genomes (MAGs) belonging to Asgard archaea and included in our analyses are shaded in colors according to phylum. MAGs that were not part of the initial description of the Asgard superphylum (Zaremba-Niedzwiedzka K, Caceres EF, Saw JH, Backstrom D, Juzokaite L, Vancaester E, Seitz KW, Anantharaman K, Starnawski P, Kjeldsen KU, Stott MB, Nunoura T, Banfield JF, Schramm A, Baker BJ, Spang A, Ettema TJ. *Nature* 541:353-358, 2017, doi:10.1038/nature21031) are shown in boldface. Naming of the respective archaeal groups based on a recent suggestion by Adam et al. (*ISMEJ* 11:2407-2425,2017,doi:10.1038/ismej.2017.122). Branch support values are based on ultrafast bootstrap approximation as well as single branch tests, respectively. Scale bar indicates the number of substitutions per site.





**Supplementary Fig. S2 - Multiple sequence alignment of archaeal and eukaryotic EF-2 and EF-2 paralogs showing domain IV sequence motifs.**

(a) Multiple sequence alignment of a selected set of EF-2 from representative organisms, showing domain IV sequence motifs as in Figure 3. *Bona fide* EF-2 homologues are shaded in grey. Organisms lacking diphthamide biosynthesis genes are indicated with 'a'. (b) Diphthamide modification motifs are not conserved in parabasalid EF-2. EF-2 sequences were mined and aligned from representative genomes or transcriptomes from each of the major lineages of eukaryotes and diphthamide-interacting residues are colored. Here, we show a representative subset of eukaryotes, all surveyed genomes can be found in File S1. Eukaryotic relationships are shown with a schematic cladogram. *Bona fide* diphthamidylated EF-2 sequences are shaded in purple. Boxed region indicates the region that is not conserved in most parabasalids. Parabasalid EF-2 paralogs with unsubstituted diphthamide modification motifs are shaded in yellow. All parabasalids to not encoded diphthamide biosynthesis genes as indicated with the 'no DPH' icon. SAR, Stramenopilia, Alveolata, Rhizaria; DPH, diphthamide biosynthesis genes. The *Pentatrachomonas hominis* and *Tetratrachomonas gallinarum* sequences were retrieved by assembling the sequencing projects available at the indicated SRA accession numbers. Sequences and assembly are available upon request.

**a**

Dph<sup>+</sup> Eukaryota  
canonical eEF-2

*D. melanogaster* eEF-2  
PDB : 4v6w Az

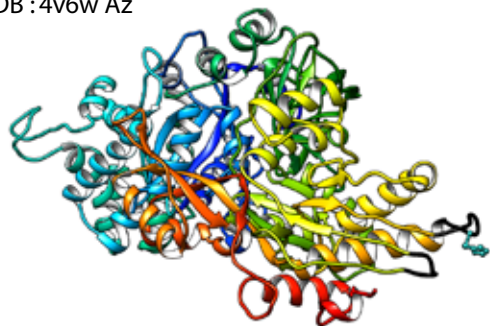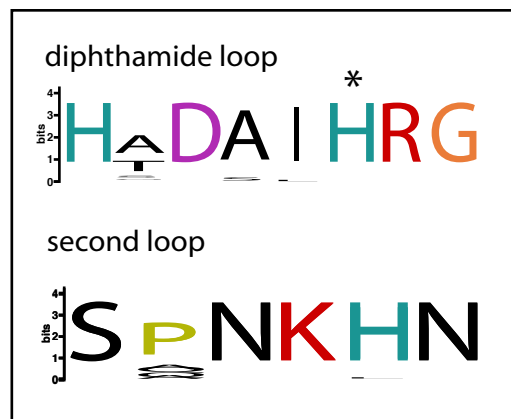

Dph<sup>-</sup> Trichomonas

*Trichomonas vaginalis* G3  
XP\_001321791\_1

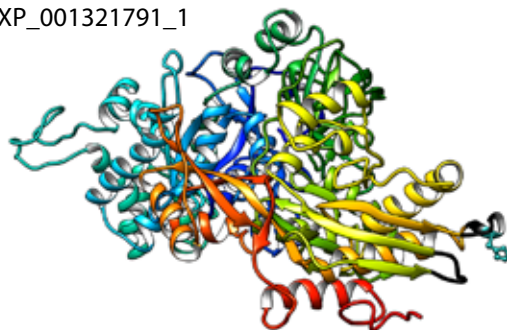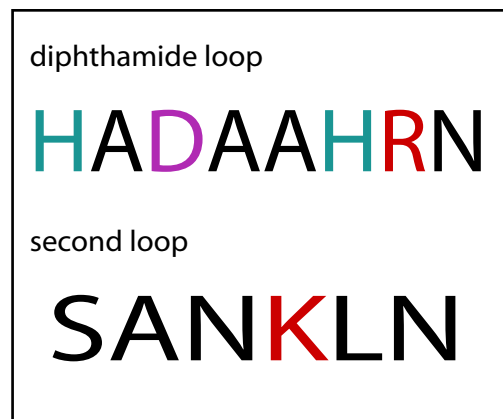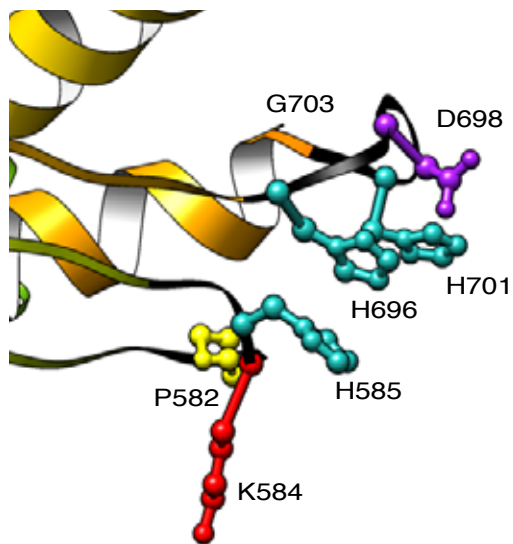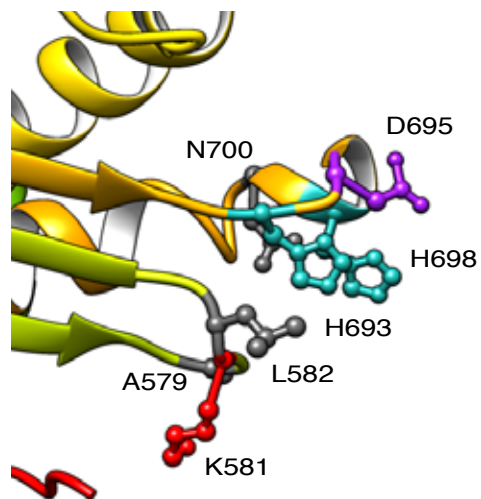**b**

Trichomonas (HRN)

H: Histidine

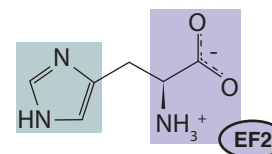

N: Asparagine

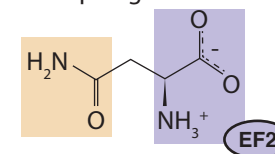

Canonical EF2 (H<sup>dbh</sup>RG)

Diphthamide

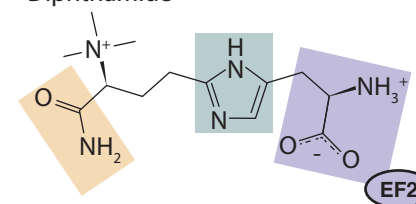

G: Glycine

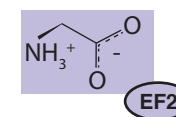

**Supplementary Fig. S3 - EF-2 gene from Dph-lacking *Trichomonas vaginalis* shown aligned to *D.***

***melanogaster* eEF-2 structure.** (a) Panels are as in Figure 3. *T. vaginalis* EF-2 fits closely to *D.*

*melanogaster* structure (RMSD of 1.589 Å across all 830 residues). While overall structure is maintained, certain key residues in domain IV loops are not conserved. (b) Structure of the three last amino acids comprising the diphthamide loop in EF-2 of *T. vaginalis* compared to canonical eukaryotic EF-2. The amino acids comprising the DRG motif of canonical EF2 (with D referring to diphthamide) have a backbone highly similar to the HRN motif of *T. vaginalis* (with the histidine being not modified to diphthamide). The mutation of the canonical G to N, which provides an amide group, may compensate for the lack of the modification of the histidine.

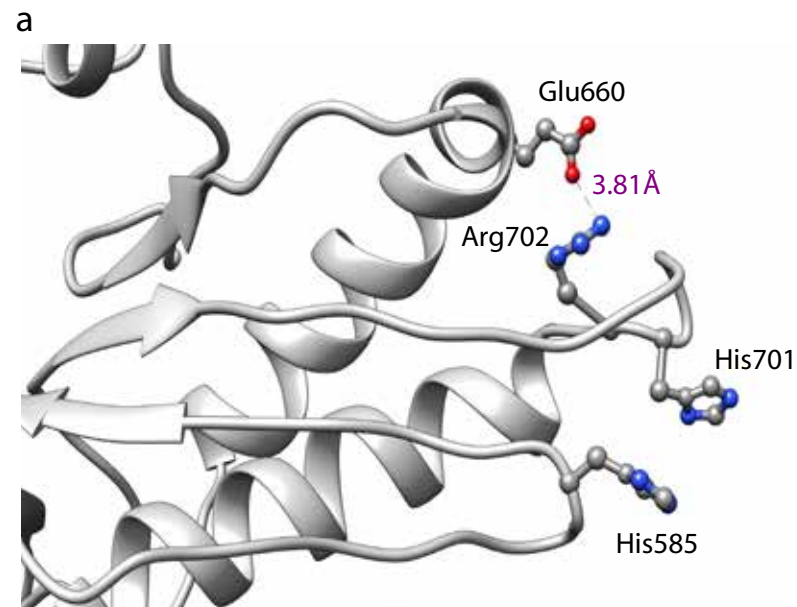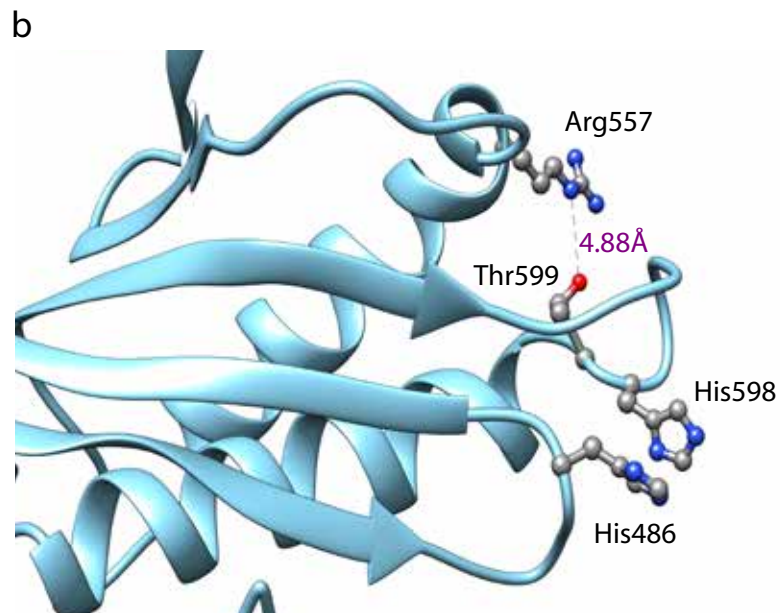

**c**

|                                          | Glu660 | Arg702 | Diphthamide synthesis pathway | EF2 paralog in genome |
|------------------------------------------|--------|--------|-------------------------------|-----------------------|
| Eukaryotes                               | E      | R      | +                             | -                     |
| Archaea                                  | E/D    | R      | +                             | -                     |
| Heimdallarchaeota LC3                    | E      | R      | +                             | -                     |
| Trichomonas                              | E      | R      | -                             | -                     |
| Korarchaeum 2/4/cryptofilum & Geoarchaea | E/D    | R      | -                             | -                     |
| Korarchaeum 1/3                          | R      | T      | -                             | +                     |
| Asgard                                   | K/R    | T      | -                             | +                     |
| Heimdall AB125 OLS33283                  | N      | T      | -                             | +                     |

**Supplementary Fig. S4 - A universally conserved EF-2 domain IV salt bridge is replaced by conserved correlated mutations in EF-2p containing genomes.** (a) EF-2 from the *D. melanogaster* EF2 cryo-EM structure (Anger AM, Armache JP, Berninghausen O, Habeck M, Subklewe M, Wilson DN, Beckmann R. Nature 497:80-5, 2013, doi:10.1038/nature12104) shows that Glu660 and Arg702, which are universally conserved in all archaeal and eukaryotic genomes lacking aEF-2p (Figure 3), form a salt bridge that stabilizes the diphthamide-containing loop of domain IV. (b) Representative modeled EF-2 structure of Thorarchaeota OWC Bin 2, with correlated mutations to Arg557 and Thr599 highlighted. (c) Thr599 is conserved in all EF-2p-containing genomes, and the correlated mutation at the Arg557 position is almost always positive or polar.

AHiDHGKT RG1I DTPGH

Table with 3 columns: Accession/ID, Amino Acid Sequence, and Taxonomic Group. The table lists various protein sequences and their corresponding taxonomic classifications, such as eukaryotic EF2, eukaryotic Ria1 (EFL1), eukaryotic Snu114 (snRNP), Heimdallarchaeota LC3 group EF2, archaeal EF2, Korarchaeota group 1 EF2, Asgard EF2, Korarchaeota group 2 EF2, Asgard EF2 paralog, Korarchaeota group 2 EF2 paralog, Bathyarchaeota EF2\*, and Bacterial EFG.

Table with 3 columns: Accession/ID, Amino Acid Sequence, and Taxonomic Group. This section continues the list of protein sequences and taxonomic classifications, including NKVD G4, GSA G5, and other related entries.

**Supplementary Fig. S5: Multiple sequence alignment showing conservation of GTP binding region motifs in Asgard aEF-2 and EF-2 paralogs.** Multiple sequence alignment of eEF-2, eEF-2 paralogs, aEF-2, aEF-2 paralogs and bacterial EF-G. Conserved GTP binding motifs G1 - G5 are shown in color in the alignment. Archaeal 60% consensus motif sequences as identified by Atkinson [BMC Genomics 16:78, 2015, [doi:10.1186/s12864-015-1289-7](https://doi.org/10.1186/s12864-015-1289-7)] are shown outside the alignment and residues associated with cation binding are shown in red.



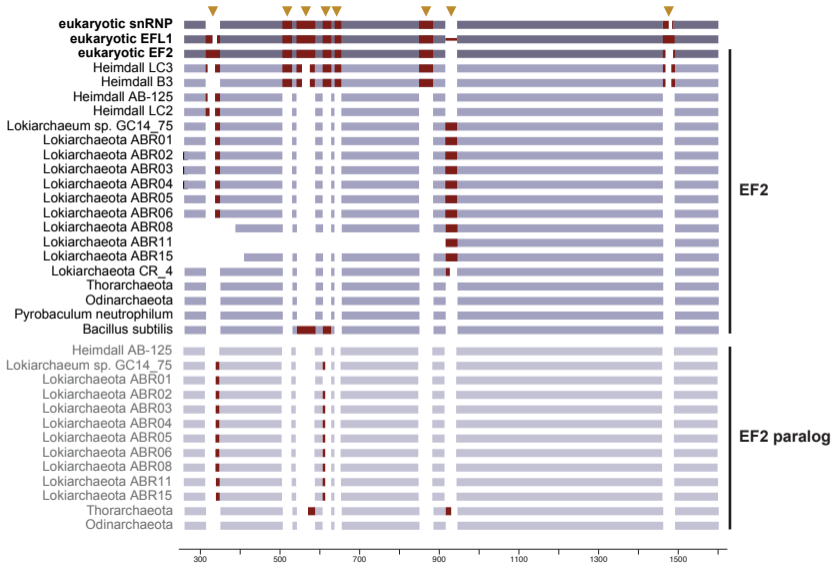

**Supplementary Fig. S6: Schematic view of occurrence of indels in archaeal, eukaryotic and bacterial EF-2 and EF-2 paralogs.** The cartoon is based on an alignment of EF-2 and EF-2 paralogs from a selected set of representative organisms, mainly comprising Asgard archaea and Eukaryotes. Canonical EF-2 sequences are represented by purple and EF-2 paralogs by light purple bars. Potential indels are shaded by red bars and indel positions are highlighted with orange triangles.

NP\_001952.1\_Homo\_sapiens1-858  
XP\_006454257.1\_Agaricus\_bisporus\_var\_bisporus\_H97/1-842  
OJ15956.1\_Trametes\_pubescentes1-927  
K2P2897.1\_Fibulohizocytia\_sp\_CBS\_109695/1-842  
KXN7007.1\_Candidiobolus\_coronatus\_NRR1\_28638/1-1043  
BAF85797.1\_Homo\_sapiens1-972  
XP\_006453987.1\_Agaricus\_bisporus\_var\_bisporus\_H97/1-1085  
CD073131.1\_Trametes\_cinnabarin1-944  
K2P28932.1\_Fibulohizocytia\_sp\_CBS\_109695/1-1509  
KXN70545.1\_Candidiobolus\_coronatus\_NRR1\_28638/1-982  
OLS27505\_Heimdallarchaeota\_archaeon\_LC\_3/1-828  
Heimdallarchaeota\_archaeon\_B3  
YP\_001794467.1\_Pyrobaculum\_neutrophilum\_V245ta/1-740  
YP\_001582082.1\_Nitrosopumilus\_maritimus\_SCM1/1-730  
OGD49094.1\_Candidatus\_Bathyrchaeta\_archaeon\_RBG\_13\_46\_16b/1-738  
KON34131.1\_miscellaneous\_Crenarchaeota\_group\_6\_archaeon\_ADB-1/1-738  
2504814065\_Georchaeota\_archaeon\_OSPB\_1/1-736  
YP\_001736560.1\_Candidatus\_Korarchaeum\_cryptofilum\_OPPB/1-739  
lcl\_LHC\_01286\_LHC\_01286/1-739  
lcl\_kor\_00704\_kor\_00704/1-739  
lcl\_kor\_00485\_kor\_00485/1-628  
lcl\_ABR03\_12650\_hypothetical\_protein/1-677  
lcl\_ABR05\_04650\_Elongation\_factor\_2/1-750  
lcl\_ABR06\_25720\_Elongation\_factor\_2/1-750  
lcl\_ABR02\_20700\_Elongation\_factor\_2/1-783  
lcl\_ABR04\_02460\_Elongation\_factor\_2/1-750  
lcl\_ABR08\_09930\_Elongation\_factor\_2/1-619  
lcl\_ABR11\_18460\_hypothetical\_protein/1-369  
lcl\_ABR13\_10980\_Elongation\_factor\_2/1-709  
lcl\_ABR15\_20820\_Elongation\_factor\_2/1-587  
lcl\_ABR01\_20000\_Elongation\_factor\_2/1-747  
KK44407\_Lokiarchaeum\_sp\_GC14\_75/1-752  
OLS15932\_Lokiarchaeota\_archaeon\_CR\_4/1-740  
KXH72312\_Thorarchaeota\_archaeon\_SMT21\_45/1-737  
OWC\_Bin2\_01519\_EF2/1-737  
KXH71555\_Thorarchaeota\_archaeon\_SMT21\_B3/1-737  
OWC\_Bin3\_01564\_EF2/1-737  
OWC\_Bin5\_00744\_EF2/1-737  
OLS17158\_Odinarchaeota\_archaeon\_LCB\_4/1-738  
OLS3283\_Heimdallarchaeota\_archaeon\_AB\_125/1-745  
OLS2544\_Heimdallarchaeota\_archaeon\_LC\_2/1-735  
lcl\_kor\_00187\_kor\_00187/1-614  
lcl\_kor\_01297\_kor\_01297/1-666  
lcl\_ABR06\_17420\_Elongation\_factor\_2/1-729  
lcl\_ABR05\_09740\_Elongation\_factor\_2/1-729  
lcl\_ABR03\_25750\_Elongation\_factor\_2/1-307  
lcl\_ABR02\_00250\_Elongation\_factor\_2/1-729  
lcl\_ABR04\_33160\_Elongation\_factor\_2/1-729  
lcl\_ABR08\_05420\_Elongation\_factor\_2/1-729  
lcl\_ABR11\_09000\_Elongation\_factor\_2/1-729  
lcl\_ABR15\_25140\_Elongation\_factor\_2/1-729  
lcl\_ABR01\_14510\_Elongation\_factor\_2/1-729  
KK45003\_Lokiarchaeum\_sp\_GC14\_75/1-414  
lcl\_ABR14\_07490\_Elongation\_factor\_2/1-686  
OLS17734\_Odinarchaeota\_archaeon\_LCB\_4/1-717  
KXH73341\_Thorarchaeota\_archaeon\_SMT21\_45/1-687  
OLS30427\_Thorarchaeota\_archaeon\_AB\_25/1-687  
lcl\_ABR09\_06640\_Elongation\_factor\_2/1-696  
OWC\_Bin2\_01874\_EF2p/1-698  
OWC\_Bin3\_02499\_EF2p\_partial/1-274  
OWC\_Bin5\_00525\_EF2p\_partial/1-237  
OLS33013\_Heimdallarchaeota\_archaeon\_AB\_125/1-669  
lcl\_kor\_00670\_kor\_00670/1-685  
lcl\_kor\_00548\_kor\_00548/1-710  
KON31906.1\_miscellaneous\_Crenarchaeota\_group\_1\_archaeon\_SGB-32-3/1-711  
OGD49652.1\_Candidatus\_Bathyrchaeta\_archaeon\_RBG\_13\_46\_16b/1-554  
Bacillus\_subtilis\_16\_BSU01120/1-692

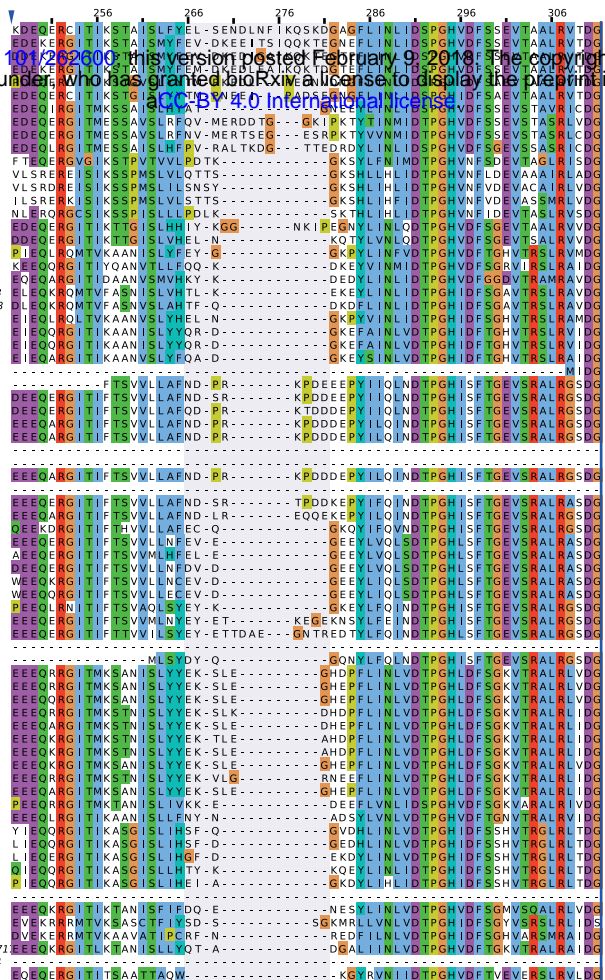

bioRxiv preprint doi: <https://doi.org/10.1101/202009>; this version posted February 9, 2018. The copyright holder for this preprint (which was not certified by peer review) is the author/funder, who has granted bioRxiv a license to display the preprint in perpetuity. It is made available under aCC-BY 4.0 International license.

eukaryotic Rla1 (EFL1)

eukaryotic Snu114 (snRNP)

Heimdallarchaeota LC3 group EF-2

archaeal EF-2

Georchaeota EF-2

Korarchaeota group 1 EF-2

Asgard EF-2

Korarchaeota group 2 EF-2

Asgard EF-2 paralog

Korarchaeota group 2 EF-2 paralog

Bathyrchaeta EF-2 paralog

bacterial EF-2

NP\_001952.1\_Homo\_sapiens1-858  
XP\_006454257.1\_Agaricus\_bisporus\_var\_bisporus\_H97/1-842  
OJ15956.1\_Trametes\_pubescentes1-927  
K2P2897.1\_Fibulohizocytia\_sp\_CBS\_109695/1-842  
XN7007.1\_Candidiobolus\_coronatus\_NRR1\_28638/1-1043  
BAF85797.1\_Homo\_sapiens1-972  
XP\_006453987.1\_Agaricus\_bisporus\_var\_bisporus\_H97/1-1085  
CD073131.1\_Trametes\_cinnabarin1-944  
K2P28932.1\_Fibulohizocytia\_sp\_CBS\_109695/1-1509  
KXN70545.1\_Candidiobolus\_coronatus\_NRR1\_28638/1-982  
OLS27505\_Heimdallarchaeota\_archaeon\_LC\_3/1-828  
Heimdallarchaeota\_archaeon\_B3  
YP\_001794467.1\_Pyrobaculum\_neutrophilum\_V245ta/1-740  
YP\_001582082.1\_Nitrosopumilus\_maritimus\_SCM1/1-730  
OGD49094.1\_Candidatus\_Bathyrchaeta\_archaeon\_RBG\_13\_46\_16b/1-738  
KON34131.1\_miscellaneous\_Crenarchaeota\_group\_6\_archaeon\_ADB-1/1-738  
2504814065\_Georchaeota\_archaeon\_OSPB\_1/1-736  
YP\_001736560.1\_Candidatus\_Korarchaeum\_cryptofilum\_OPPB/1-739  
lcl\_LHC\_01286\_LHC\_01286/1-739  
lcl\_kor\_00704\_kor\_00704/1-739  
lcl\_kor\_00485\_kor\_00485/1-628  
lcl\_ABR03\_12650\_hypothetical\_protein/1-677  
lcl\_ABR05\_04650\_Elongation\_factor\_2/1-750  
lcl\_ABR06\_25720\_Elongation\_factor\_2/1-750  
lcl\_ABR02\_20700\_Elongation\_factor\_2/1-783  
lcl\_ABR04\_02460\_Elongation\_factor\_2/1-750  
lcl\_ABR08\_09930\_Elongation\_factor\_2/1-619  
lcl\_ABR11\_18460\_hypothetical\_protein/1-369  
lcl\_ABR13\_10980\_Elongation\_factor\_2/1-709  
lcl\_ABR15\_20820\_Elongation\_factor\_2/1-587  
lcl\_ABR01\_20000\_Elongation\_factor\_2/1-747  
KK44407\_Lokiarchaeum\_sp\_GC14\_75/1-752  
OLS15932\_Lokiarchaeota\_archaeon\_CR\_4/1-740  
KXH72312\_Thorarchaeota\_archaeon\_SMT21\_45/1-737  
OWC\_Bin2\_01519\_EF2/1-737  
KXH71555\_Thorarchaeota\_archaeon\_SMT21\_B3/1-737  
OWC\_Bin3\_01564\_EF2/1-737  
OWC\_Bin5\_00744\_EF2/1-737  
OLS17158\_Odinarchaeota\_archaeon\_LCB\_4/1-738  
OLS3283\_Heimdallarchaeota\_archaeon\_AB\_125/1-745  
OLS2544\_Heimdallarchaeota\_archaeon\_LC\_2/1-735  
lcl\_kor\_00187\_kor\_00187/1-614  
lcl\_kor\_01297\_kor\_01297/1-666  
lcl\_ABR06\_17420\_Elongation\_factor\_2/1-729  
lcl\_ABR05\_09740\_Elongation\_factor\_2/1-729  
lcl\_ABR03\_25750\_Elongation\_factor\_2/1-307  
lcl\_ABR02\_00250\_Elongation\_factor\_2/1-729  
lcl\_ABR04\_33160\_Elongation\_factor\_2/1-729  
lcl\_ABR08\_05420\_Elongation\_factor\_2/1-729  
lcl\_ABR11\_09000\_Elongation\_factor\_2/1-729  
lcl\_ABR15\_25140\_Elongation\_factor\_2/1-729  
lcl\_ABR01\_14510\_Elongation\_factor\_2/1-729  
KK45003\_Lokiarchaeum\_sp\_GC14\_75/1-414  
lcl\_ABR14\_07490\_Elongation\_factor\_2/1-686  
OLS17734\_Odinarchaeota\_archaeon\_LCB\_4/1-717  
KXH73341\_Thorarchaeota\_archaeon\_SMT21\_45/1-687  
OLS30427\_Thorarchaeota\_archaeon\_AB\_25/1-687  
lcl\_ABR09\_06640\_Elongation\_factor\_2/1-696  
OWC\_Bin2\_01874\_EF2p/1-698  
OWC\_Bin3\_02499\_EF2p\_partial/1-274  
OWC\_Bin5\_00525\_EF2p\_partial/1-237  
OLS33013\_Heimdallarchaeota\_archaeon\_AB\_125/1-669  
lcl\_kor\_00670\_kor\_00670/1-685  
lcl\_kor\_00548\_kor\_00548/1-710  
KON31906.1\_miscellaneous\_Crenarchaeota\_group\_1\_archaeon\_SGB-32-3/1-711  
OGD49652.1\_Candidatus\_Bathyrchaeta\_archaeon\_RBG\_13\_46\_16b/1-554  
Bacillus\_subtilis\_16\_BSU01120/1-692

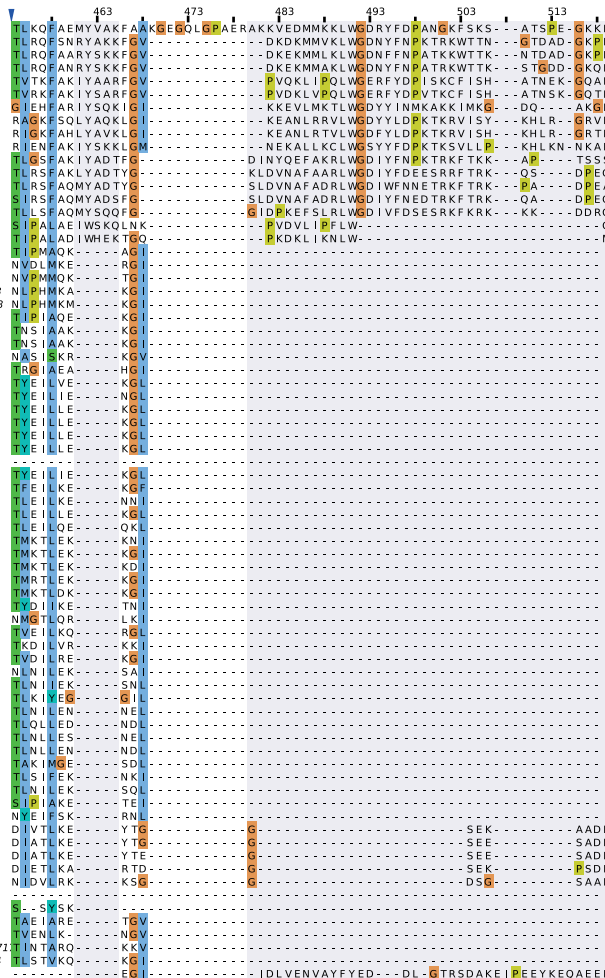

eukaryotic EF-2

eukaryotic Rla1 (EFL1)

eukaryotic Snu114 (snRNP)

Heimdallarchaeota LC3 group EF-2

archaeal EF-2

Georchaeota EF-2

Korarchaeota group 1 EF-2

Asgard EF-2

Korarchaeota group 2 EF-2

Asgard EF-2 paralog

Korarchaeota group 2 EF-2 paralog

Bathyrchaeta EF-2 paralog

bacterial EF-2



NP\_001952\_1\_Homo\_sapiens1-858  
XP\_006454257\_1\_Aganicus\_bisporus\_var\_bisporus\_H971/842  
OTJ15956\_1\_Trametes\_pubescentis1-927  
KZP28976\_1\_Fibulohizoclonia\_sp.CBS\_109695/1-842  
XP\_001317191\_1\_Trichomonas\_vaginalis\_G31/841  
XP\_001317191\_1\_Trichomonas\_vaginalis\_G31/841  
EAW99087\_1\_Homo\_sapiens1-1086  
XP\_006462620\_1\_Aganicus\_bisporus\_var\_bisporus\_H971/1085  
XP\_008037873\_1\_Trametes\_versicolor\_FP\_101664\_551/1-1079  
KXN70007\_1\_Candidobolus\_coronatus\_NRRL\_28638/1-1043  
BAF85797\_1\_Homo\_sapiens1-972  
XP\_006453987\_1\_Aganicus\_bisporus\_var\_bisporus\_H971-1485  
CD073131\_1\_Trametes\_cinnabarin1-944  
KZP28932\_1\_Fibulohizoclonia\_sp.CBS\_109695/1-1509  
KXN70545\_1\_Candidobolus\_coronatus\_NRRL\_28638/1-982  
OL527505\_Heimdallarchaeota\_archaeon\_LC\_31-828  
Heimdallarchaeota\_archaeon\_B3  
YP\_001794467\_1\_Pyrobaculum\_neutrophilum\_V245ta/1-740  
YP\_001582082\_1\_Nitrosopumilus\_maritimus\_SCM1/1-730  
YP\_004291575\_1\_Methanobacterium\_sp.\_AL\_21/1-730  
OGD49094\_1\_Candidatus\_Bathyarchaeota\_archaeon\_RBG\_13\_46\_16b/1-738  
KON34131\_1\_miscellaneous\_Crenarchaeota\_group\_6\_archaeon\_ADB-1/1-738  
Z504814065\_Geoarchaeota\_archaeon\_OSPB\_1/1-738  
YP\_001736560\_1\_Candidatus\_Korarchaeum\_cryptofilum\_OFF8/1-739  
lcl\_LHC\_01286\_LHC\_01286/1-739  
lcl\_kor\_00704\_kor\_00704/1-739  
lcl\_kor\_00485\_kor\_00485/1-628  
lcl\_ABR03\_12650\_hypothetical\_protein/1-677  
lcl\_ABR05\_04650\_Elongation\_factor\_2/1-750  
lcl\_ABR06\_25720\_Elongation\_factor\_2/1-750  
lcl\_ABR02\_20700\_Elongation\_factor\_2/1-783  
lcl\_ABR04\_02460\_Elongation\_factor\_2/1-750  
lcl\_ABR08\_09930\_Elongation\_factor\_2/1-619  
lcl\_ABR11\_18460\_hypothetical\_protein/1-369  
lcl\_ABR13\_10980\_Elongation\_factor\_2/1-709  
lcl\_ABR15\_20820\_Elongation\_factor\_2/1-587  
lcl\_ABR01\_20000\_Elongation\_factor\_2/1-747  
KK44407\_Lokiarchaeum\_sp.GC14\_75/1-752  
OL515932\_Lokiarchaeota\_archaeon\_CR\_4/1-740  
KXH72312\_Thorarchaeota\_archaeon\_SMTZ1\_45/1-737  
OWC\_bin2\_01519\_EF2/1-737  
KXH71555\_Thorarchaeota\_archaeon\_SMTZ1\_83/1-737  
OWC\_bin3\_01564\_EF2/1-737  
OWC\_bin5\_00744\_EF2/1-737  
OL517158\_Odinarchaeota\_archaeon\_LCB\_4/1-738  
OL532383\_Heimdallarchaeota\_archaeon\_AB\_125/1-745  
OL522544\_Heimdallarchaeota\_archaeon\_LC\_2/1-735  
lcl\_kor\_00187\_kor\_00187/1-614  
lcl\_kor\_01297\_kor\_01297/1-666  
lcl\_ABR06\_17420\_Elongation\_factor\_2/1-729  
lcl\_ABR05\_09740\_Elongation\_factor\_2/1-729  
lcl\_ABR03\_25750\_Elongation\_factor\_2/1-729  
lcl\_ABR02\_00250\_Elongation\_factor\_2/1-729  
lcl\_ABR04\_33160\_Elongation\_factor\_2/1-729  
lcl\_ABR08\_05420\_Elongation\_factor\_2/1-729  
lcl\_ABR11\_09000\_Elongation\_factor\_2/1-729  
lcl\_ABR15\_25140\_Elongation\_factor\_2/1-729  
lcl\_ABR01\_14510\_Elongation\_factor\_2/1-729  
KK45003\_Lokiarchaeum\_sp.GC14\_75/1-752  
lcl\_ABR14\_07490\_Elongation\_factor\_2/1-686  
OL517734\_Odinarchaeota\_archaeon\_LCB\_4/1-717  
KXH73341\_Thorarchaeota\_archaeon\_SMTZ1\_45/1-687  
OL530427\_Thorarchaeota\_archaeon\_AB\_25/1-687  
lcl\_ABR09\_06640\_Elongation\_factor\_2/1-696  
OWC\_bin2\_01874\_EF2p/1-698  
OWC\_bin3\_02499\_EF2p\_partial/1-274  
OWC\_bin5\_00525\_EF2p\_partial/1-237  
OL533013\_Heimdallarchaeota\_archaeon\_AB\_125/1-669  
lcl\_kor\_00670\_kor\_00670/1-710  
lcl\_kor\_00548\_kor\_00548/1-710  
KON31906\_1\_miscellaneous\_Crenarchaeota\_group\_1\_archaeon\_SG8-32-3/1-717  
OGD49652\_1\_Candidatus\_Bathyarchaeota\_archaeon\_RBG\_13\_46\_16b/1-554  
Bacillus\_subtilis\_16\_BSU01120/1-692

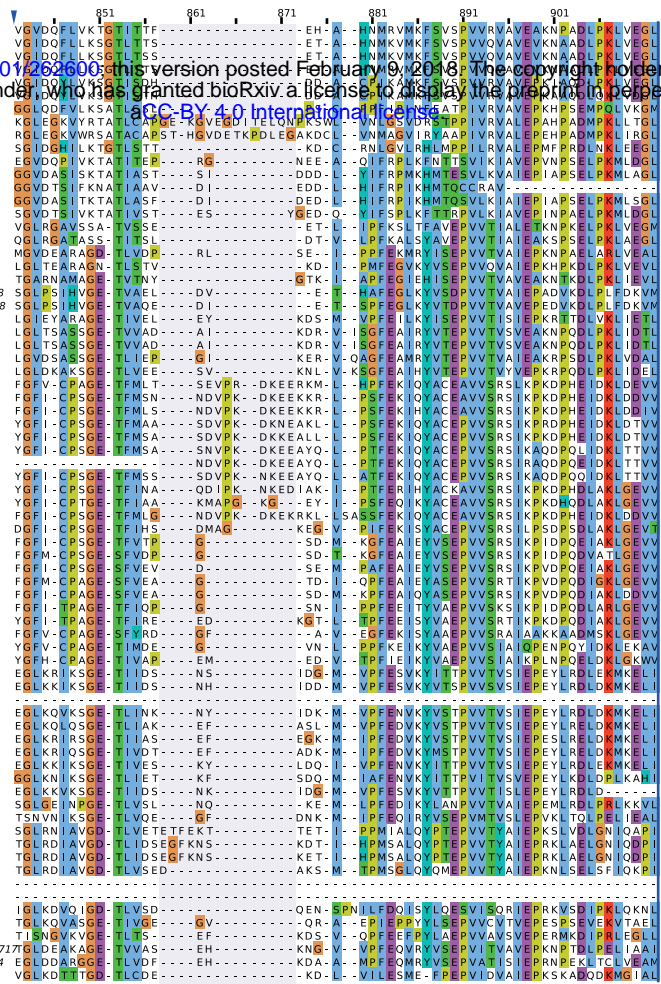

eukaryotic EF-2  
eukaryotic R1a1 (EFL1)  
eukaryotic Snu114 (snRNP)  
Heimdallarchaeota LC3 group EF-2  
archaeal EF-2  
Geoarchaeota EF-2  
Korarchaeota group 1 EF-2  
Asgard EF-2  
Korarchaeota group 2 EF-2  
Asgard EF-2 paralog  
Korarchaeota group 2 EF-2 paralog  
Bathyarchaeota EF-2 paralog  
bacterial EF-2

NP\_001952\_1\_Homo\_sapiens1-858  
XP\_006454257\_1\_Aganicus\_bisporus\_var\_bisporus\_H971/842  
OTJ15956\_1\_Trametes\_pubescentis1-927  
KZP28976\_1\_Fibulohizoclonia\_sp.CBS\_109695/1-842  
XP\_001317191\_1\_Trichomonas\_vaginalis\_G31/841  
XP\_001317191\_1\_Trichomonas\_vaginalis\_G31/841  
EAW99087\_1\_Homo\_sapiens1-1086  
XP\_006462620\_1\_Aganicus\_bisporus\_var\_bisporus\_H971/1085  
XP\_008037873\_1\_Trametes\_versicolor\_FP\_101664\_551/1-1079  
KXN70007\_1\_Candidobolus\_coronatus\_NRRL\_28638/1-1043  
BAF85797\_1\_Homo\_sapiens1-972  
XP\_006453987\_1\_Aganicus\_bisporus\_var\_bisporus\_H971-1485  
CD073131\_1\_Trametes\_cinnabarin1-944  
KZP28932\_1\_Fibulohizoclonia\_sp.CBS\_109695/1-1509  
KXN70545\_1\_Candidobolus\_coronatus\_NRRL\_28638/1-982  
OL527505\_Heimdallarchaeota\_archaeon\_LC\_31-828  
Heimdallarchaeota\_archaeon\_B3  
YP\_001794467\_1\_Pyrobaculum\_neutrophilum\_V245ta/1-740  
YP\_001582082\_1\_Nitrosopumilus\_maritimus\_SCM1/1-730  
YP\_004291575\_1\_Methanobacterium\_sp.\_AL\_21/1-730  
OGD49094\_1\_Candidatus\_Bathyarchaeota\_archaeon\_RBG\_13\_46\_16b/1-738  
KON34131\_1\_miscellaneous\_Crenarchaeota\_group\_6\_archaeon\_ADB-1/1-738  
Z504814065\_Geoarchaeota\_archaeon\_OSPB\_1/1-738  
YP\_001736560\_1\_Candidatus\_Korarchaeum\_cryptofilum\_OFF8/1-739  
lcl\_LHC\_01286\_LHC\_01286/1-739  
lcl\_kor\_00704\_kor\_00704/1-739  
lcl\_kor\_00485\_kor\_00485/1-628  
lcl\_ABR03\_12650\_hypothetical\_protein/1-677  
lcl\_ABR05\_04650\_Elongation\_factor\_2/1-750  
lcl\_ABR06\_25720\_Elongation\_factor\_2/1-750  
lcl\_ABR02\_20700\_Elongation\_factor\_2/1-783  
lcl\_ABR04\_02460\_Elongation\_factor\_2/1-750  
lcl\_ABR08\_09930\_Elongation\_factor\_2/1-619  
lcl\_ABR11\_18460\_hypothetical\_protein/1-369  
lcl\_ABR13\_10980\_Elongation\_factor\_2/1-709  
lcl\_ABR15\_20820\_Elongation\_factor\_2/1-587  
lcl\_ABR01\_20000\_Elongation\_factor\_2/1-747  
KK44407\_Lokiarchaeum\_sp.GC14\_75/1-752  
OL515932\_Lokiarchaeota\_archaeon\_CR\_4/1-740  
KXH72312\_Thorarchaeota\_archaeon\_SMTZ1\_45/1-737  
OWC\_bin2\_01519\_EF2/1-737  
KXH71555\_Thorarchaeota\_archaeon\_SMTZ1\_83/1-737  
OWC\_bin3\_01564\_EF2/1-737  
OWC\_bin5\_00744\_EF2/1-737  
OL517158\_Odinarchaeota\_archaeon\_LCB\_4/1-738  
OL532383\_Heimdallarchaeota\_archaeon\_AB\_125/1-745  
OL522544\_Heimdallarchaeota\_archaeon\_LC\_2/1-735  
lcl\_kor\_00187\_kor\_00187/1-614  
lcl\_kor\_01297\_kor\_01297/1-666  
lcl\_ABR06\_17420\_Elongation\_factor\_2/1-729  
lcl\_ABR05\_09740\_Elongation\_factor\_2/1-729  
lcl\_ABR03\_25750\_Elongation\_factor\_2/1-729  
lcl\_ABR02\_00250\_Elongation\_factor\_2/1-729  
lcl\_ABR04\_33160\_Elongation\_factor\_2/1-729  
lcl\_ABR08\_05420\_Elongation\_factor\_2/1-729  
lcl\_ABR11\_09000\_Elongation\_factor\_2/1-729  
lcl\_ABR15\_25140\_Elongation\_factor\_2/1-729  
lcl\_ABR01\_14510\_Elongation\_factor\_2/1-729  
KK45003\_Lokiarchaeum\_sp.GC14\_75/1-752  
lcl\_ABR14\_07490\_Elongation\_factor\_2/1-686  
OL517734\_Odinarchaeota\_archaeon\_LCB\_4/1-717  
KXH73341\_Thorarchaeota\_archaeon\_SMTZ1\_45/1-687  
OL530427\_Thorarchaeota\_archaeon\_AB\_25/1-687  
lcl\_ABR09\_06640\_Elongation\_factor\_2/1-696  
OWC\_bin2\_01874\_EF2p/1-698  
OWC\_bin3\_02499\_EF2p\_partial/1-274  
OWC\_bin5\_00525\_EF2p\_partial/1-237  
OL533013\_Heimdallarchaeota\_archaeon\_AB\_125/1-669  
lcl\_kor\_00670\_kor\_00670/1-710  
lcl\_kor\_00548\_kor\_00548/1-710  
KON31906\_1\_miscellaneous\_Crenarchaeota\_group\_1\_archaeon\_SG8-32-3/1-717  
OGD49652\_1\_Candidatus\_Bathyarchaeota\_archaeon\_RBG\_13\_46\_16b/1-554  
Bacillus\_subtilis\_16\_BSU01120/1-692

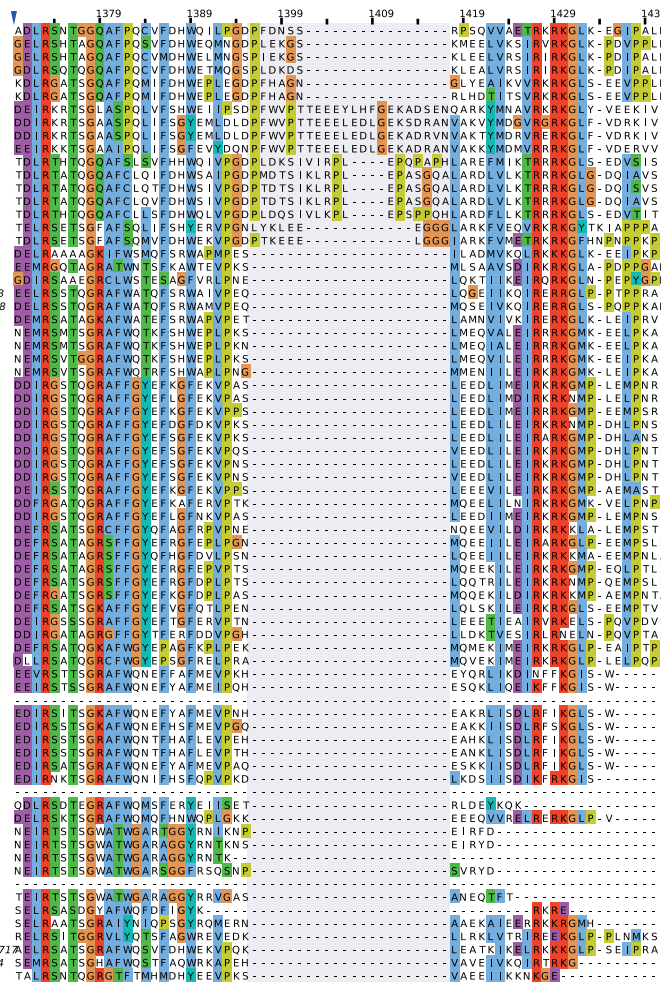

eukaryotic EF-2  
eukaryotic R1a1 (EFL1)  
eukaryotic Snu114 (snRNP)  
Heimdallarchaeota LC3 group EF-2  
archaeal EF-2  
Geoarchaeota EF-2  
Korarchaeota group 1 EF-2  
Asgard EF-2  
Korarchaeota group 2 EF-2  
Asgard EF-2 paralog  
Korarchaeota group 2 EF-2 paralog  
Bathyarchaeota EF-2 paralog  
bacterial EF-2

**Supplementary Fig. S7: Multiple sequence alignment of occurrence of indels in archaeal, eukaryotic, and bacterial EF-2 and EF-2 paralogs.** Selected characteristic indel regions derived from the multiple sequence alignment of a representative set of EF-2 homologs, which provided the basis for Fig. S6. Indel positions are shaded in light purple.

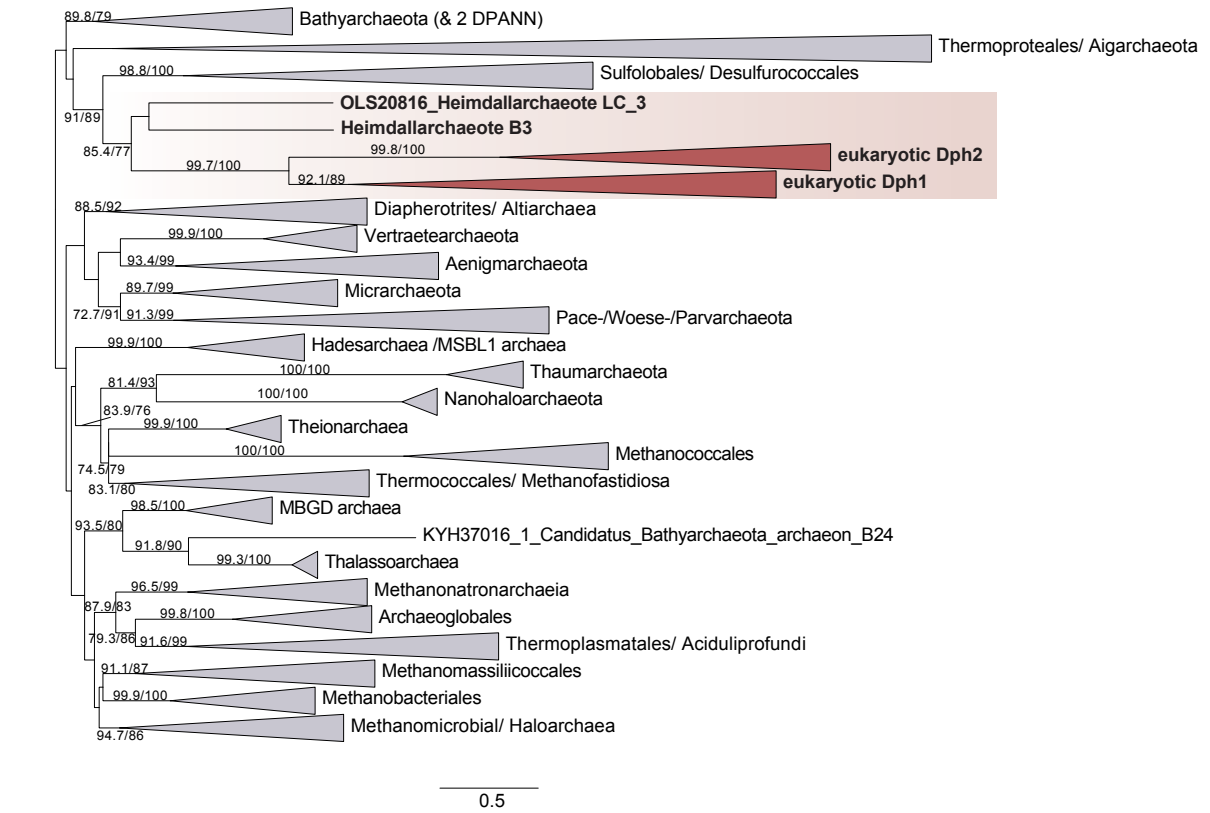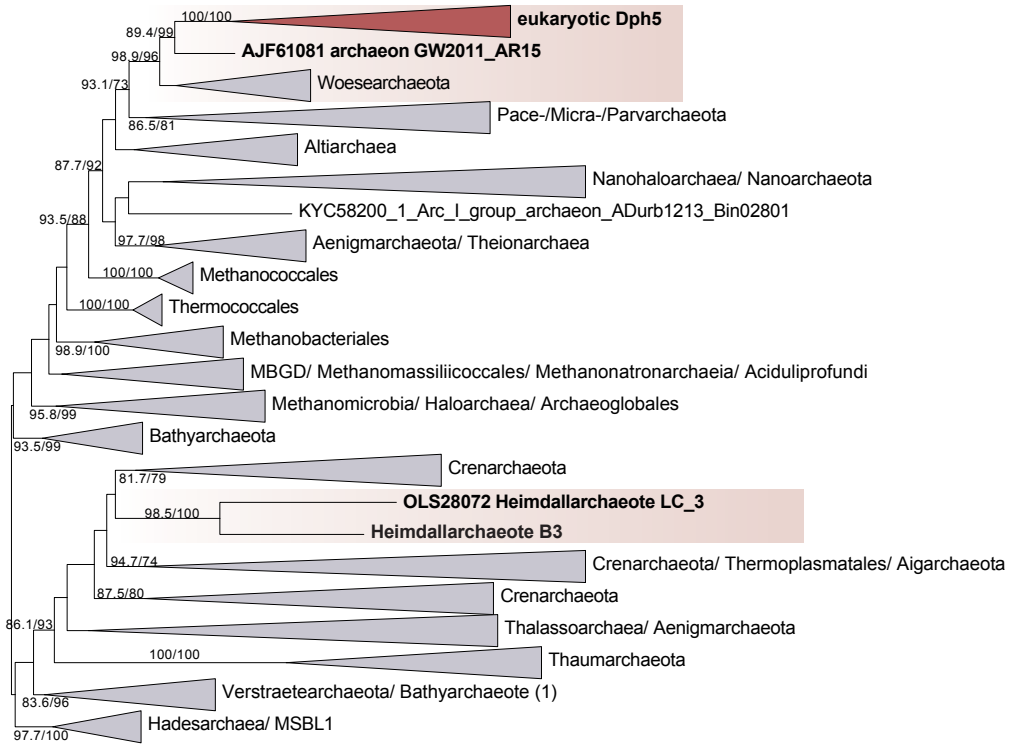

**Supplementary Fig. S8: Maximum likelihood phylogenetic analyses of Dph1/2 (a) and Dph5 (b) performed using IQ-tree.** Eukaryotic homologs were collapsed and are represented by dark red triangles, while homologs of Woesearchaeota and Heimdallarchaeota are shaded in light red. Both phylogenetic trees are unrooted. Values on branches refer to support values based on ultrafast bootstrap approximation as well as single branch tests. Whenever any of the two support values were lower than 70, bootstraps were removed. Scale bar indicates the number of substitutions per site.
